# Supplementary material for: Genome-wide CRISPR screen identifies a cytokine-enhancer circuit driving HIF-2α activation in renal cancer
Source: JCI journal article supplement (doi:10.1172/jci201639), 2026-03-24

Full unedited blot/gel for Figure 1E, 1F, 1G and 1H

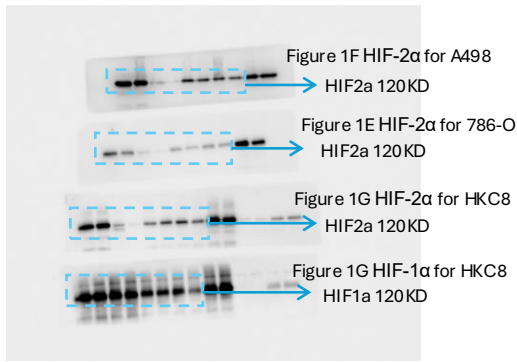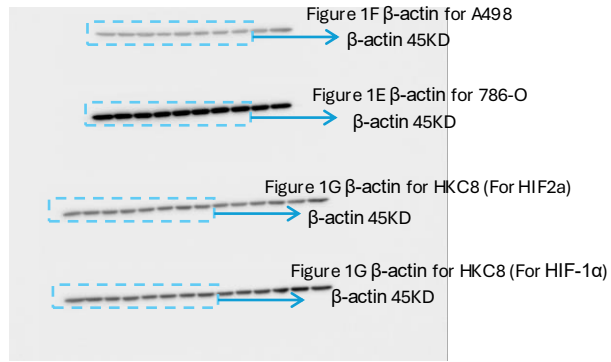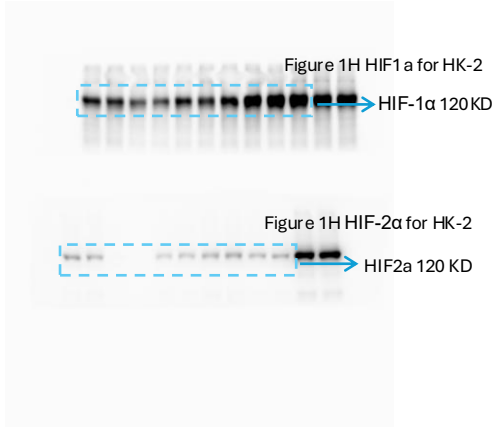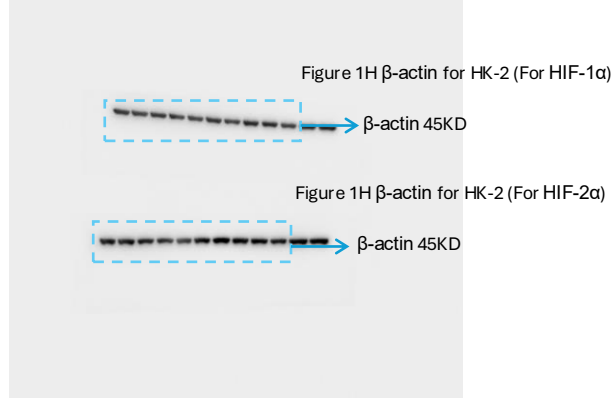

Full unedited blot/gel for Figure S1A

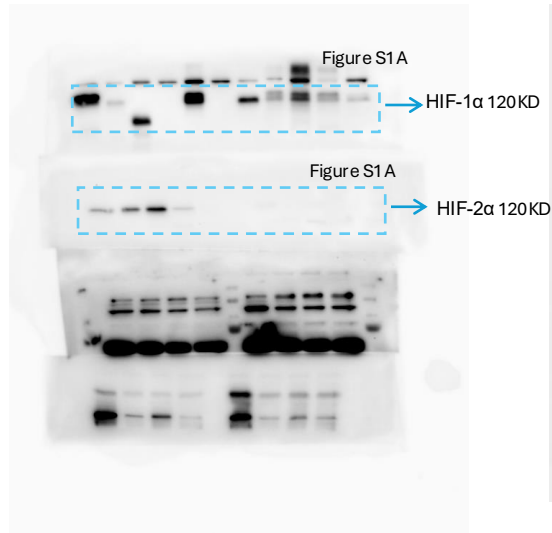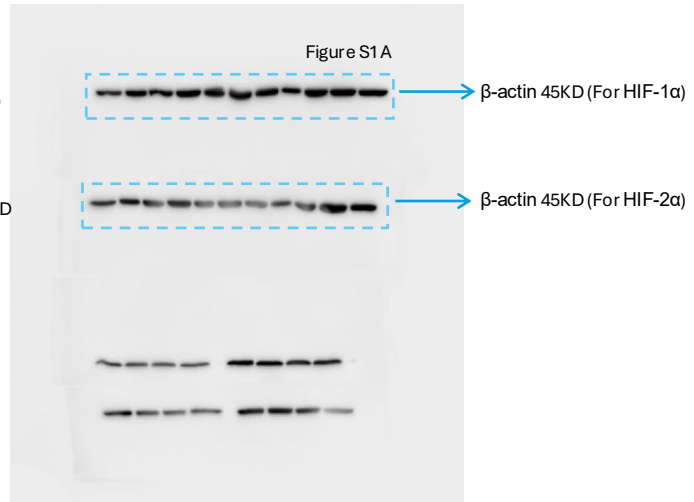

Full unedited blot/gel for Figure S1C

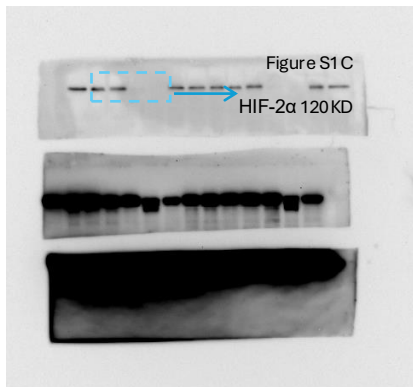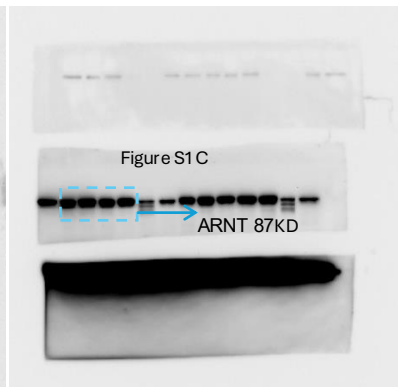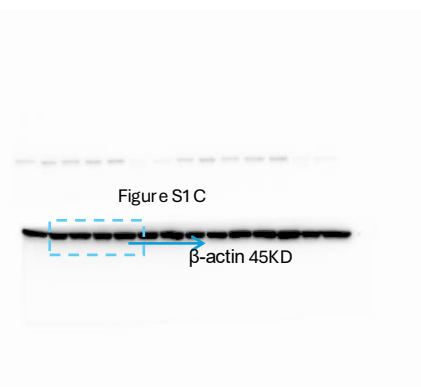

Full unedited blot/gel for Figure S1D

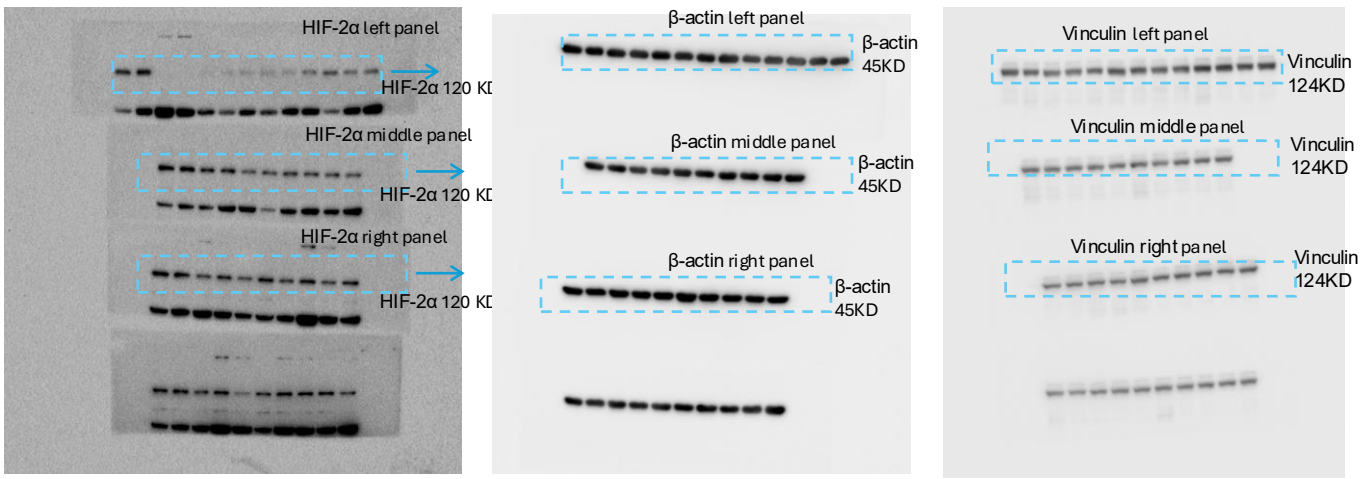

Full unedited blot/gel for Figure S1E and S1F

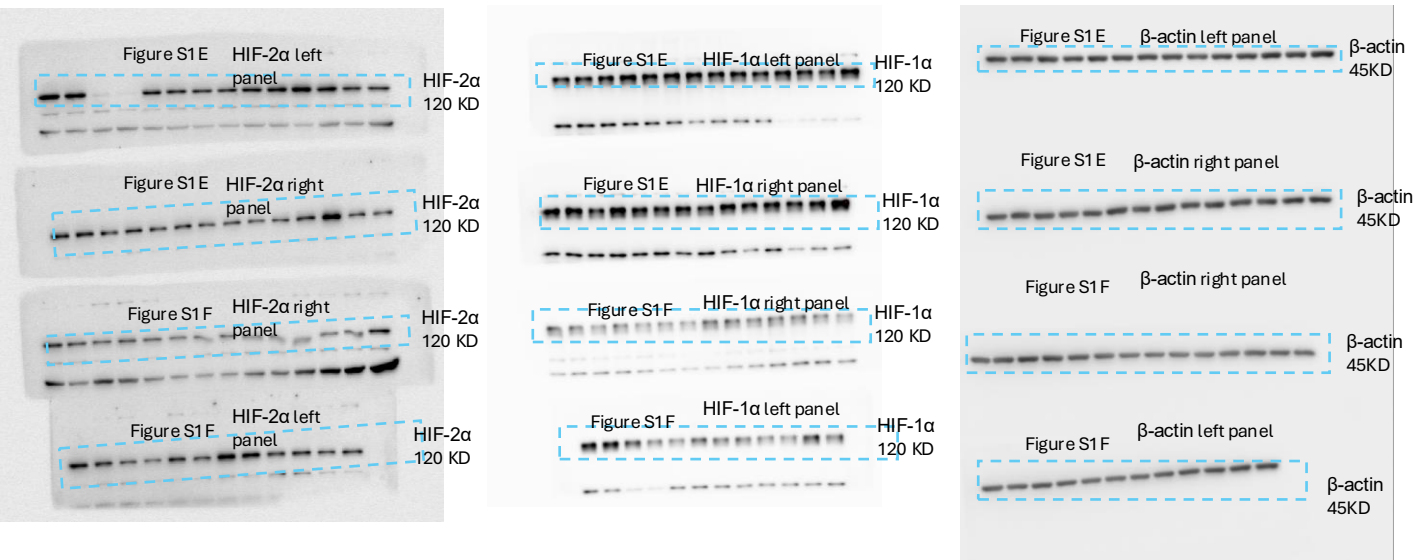

Full unedited blot/gel for Figure S1G

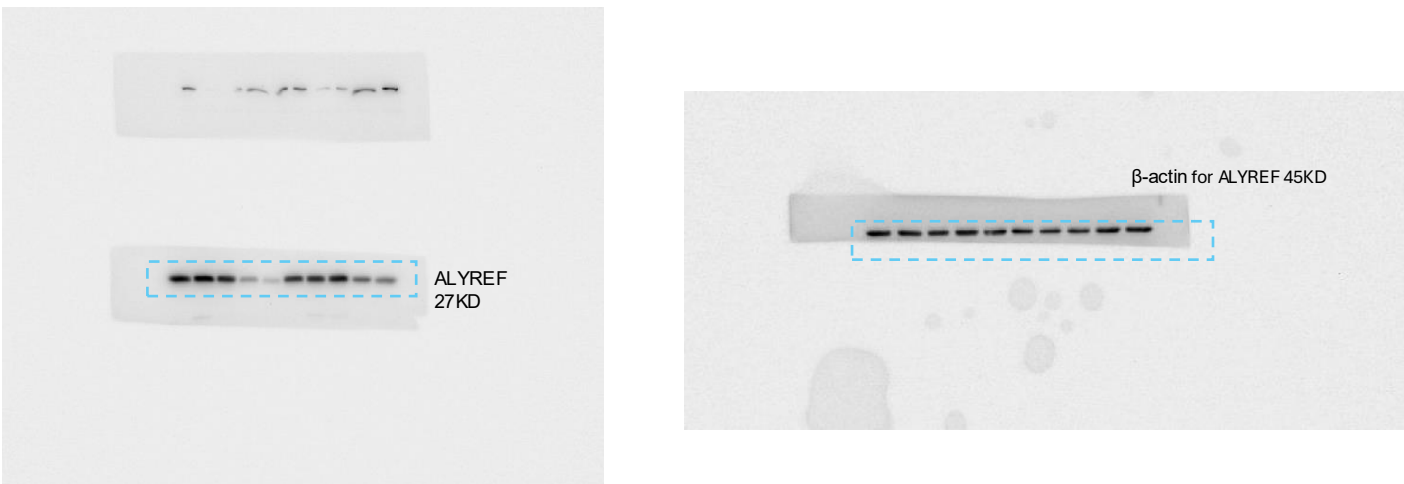

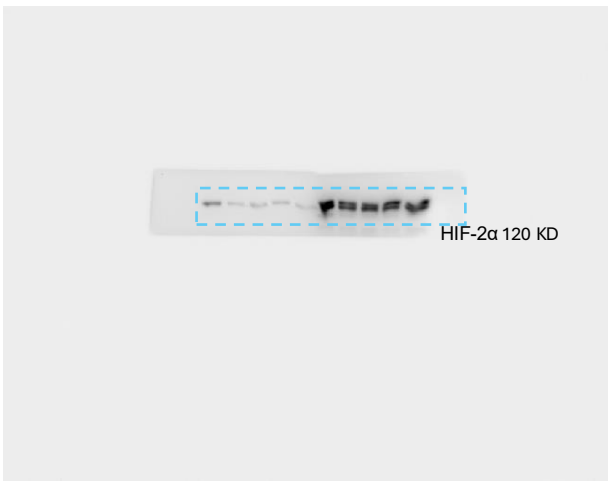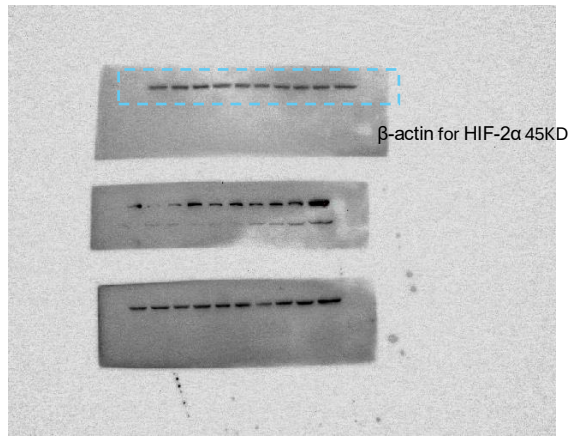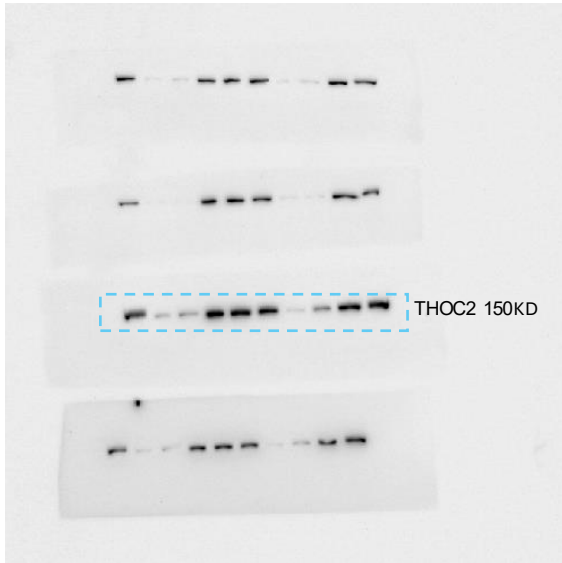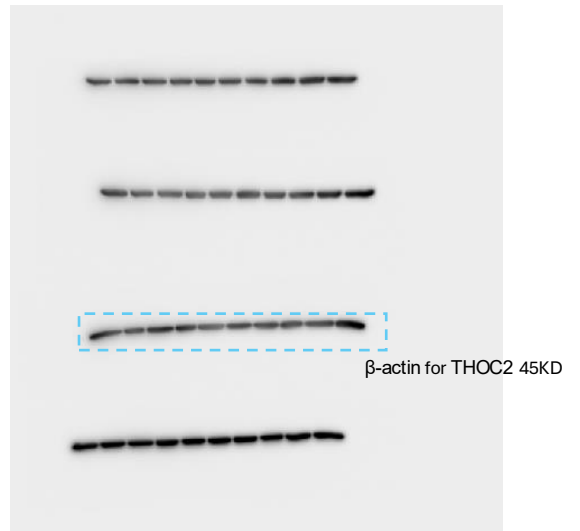

Full unedited blot/gel for Figure S11

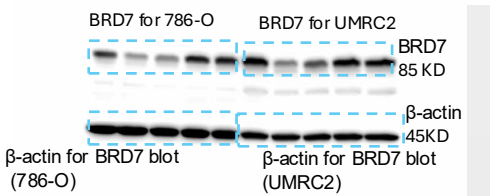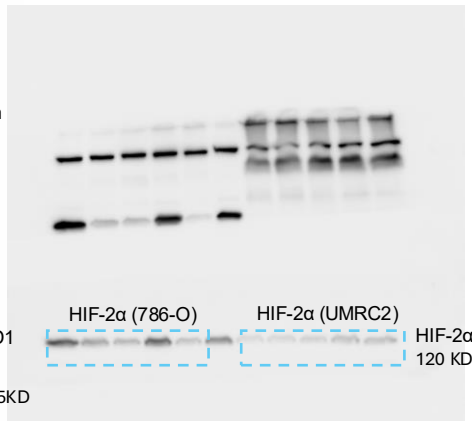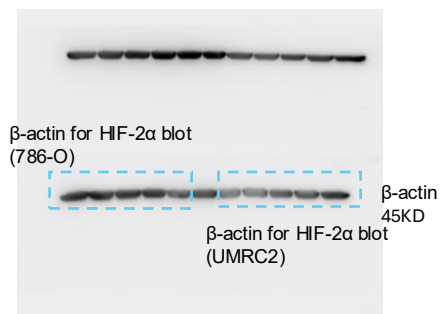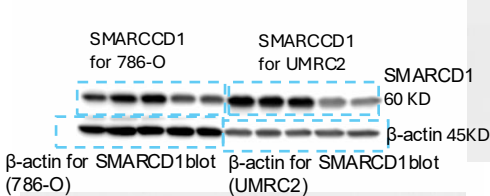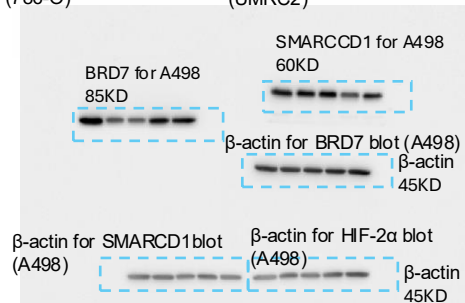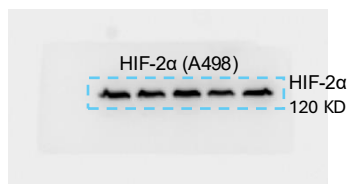

Full unedited blot/gel for Figure 2E

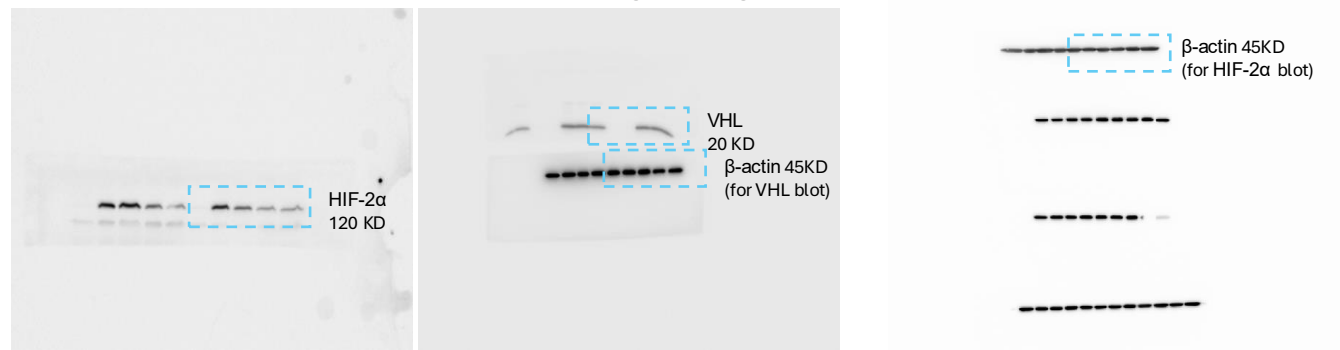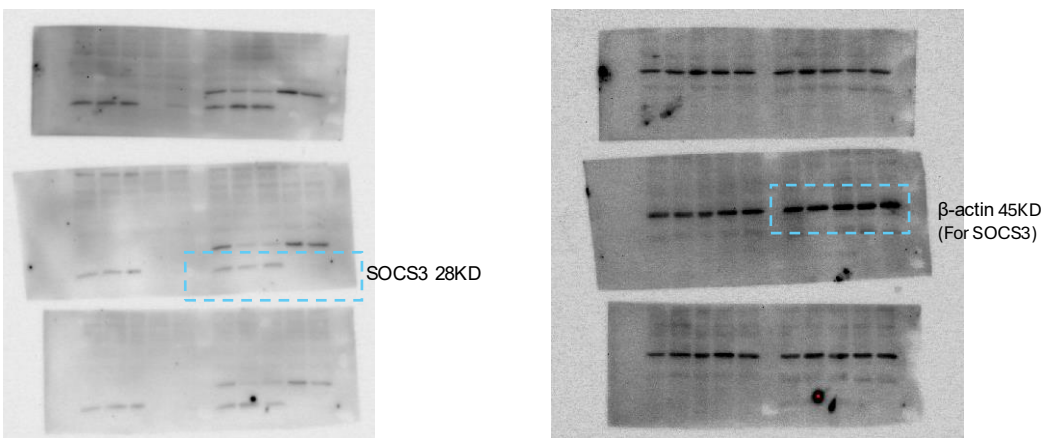

Full unedited blot/gel for Figure 2F

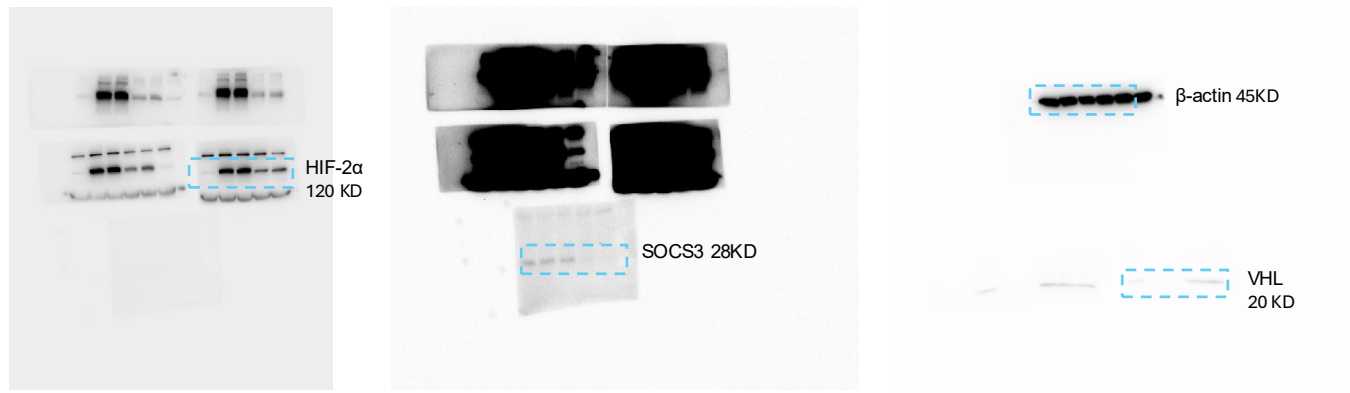

Full unedited blot/gel for Figure 2G

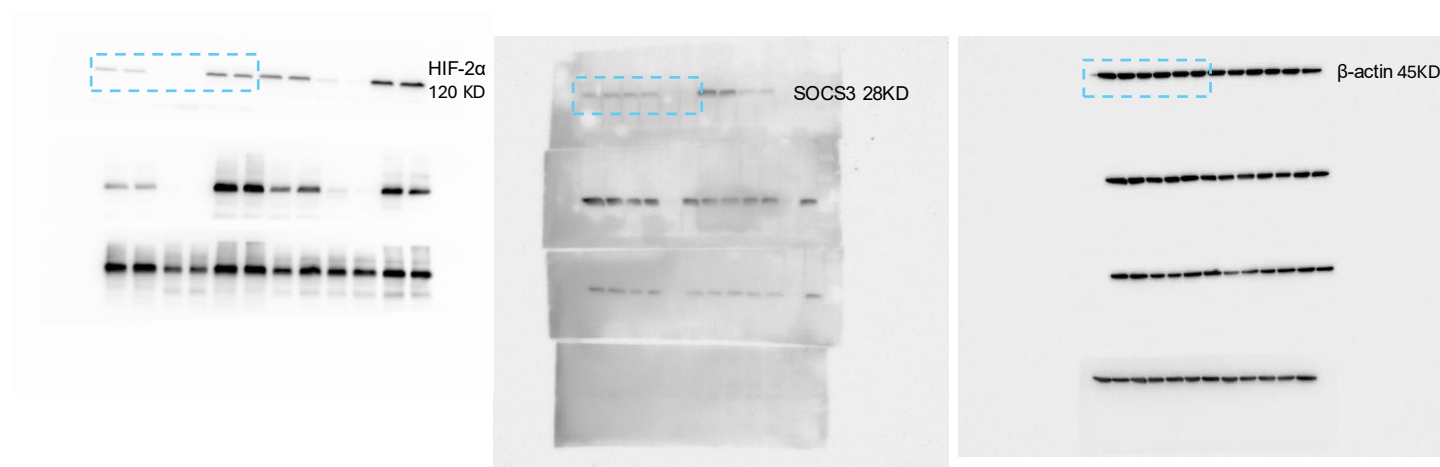

Full unedited blot/gel for Figure 2H

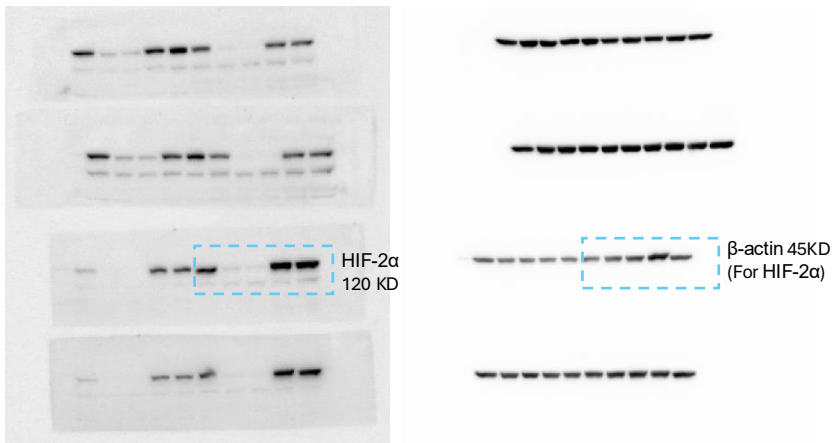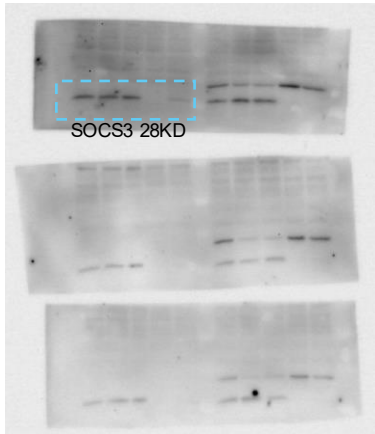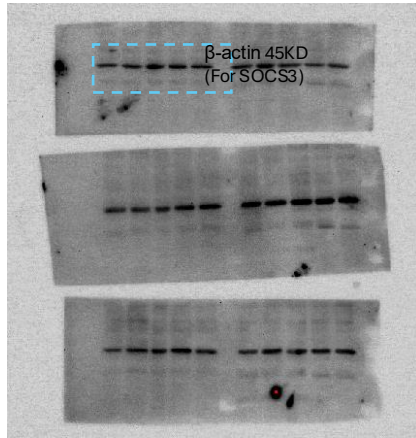

Full unedited blot/gel for Figure 2I

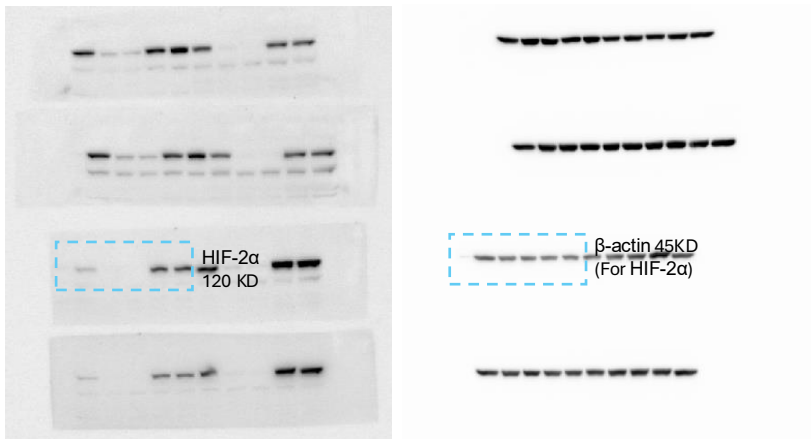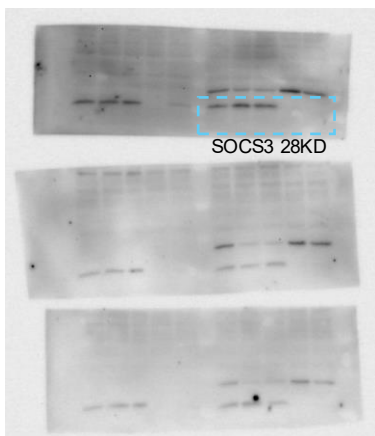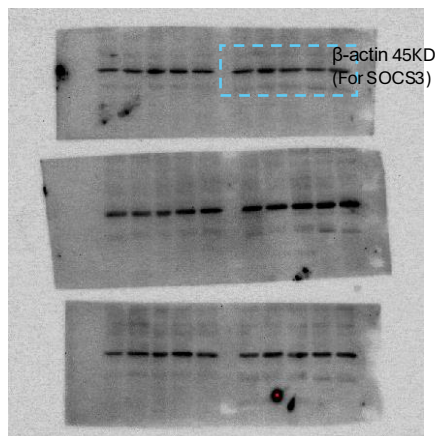

Full unedited blot/gel for Figure 2J

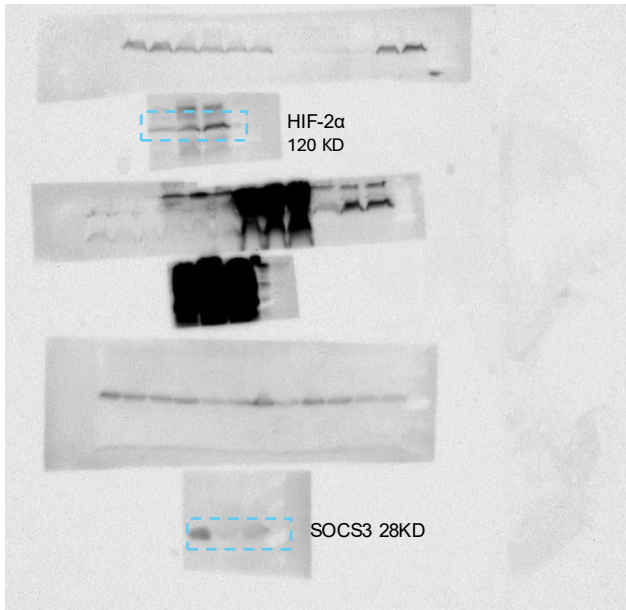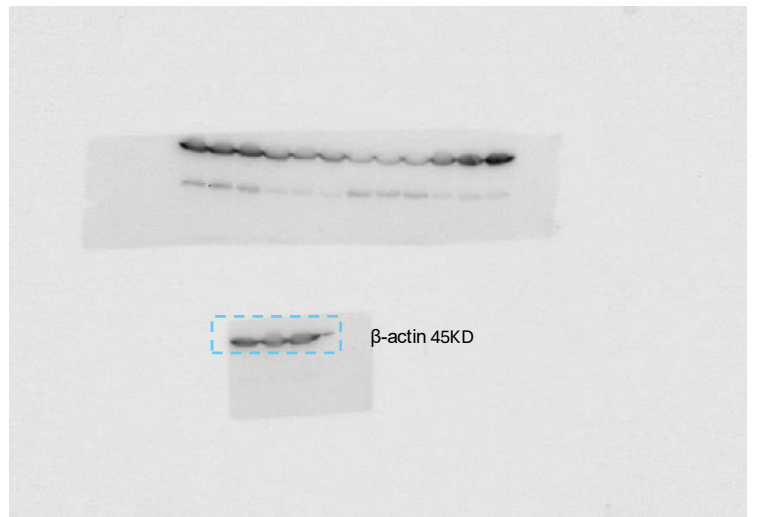

Full unedited blot/gel for Figure 2K

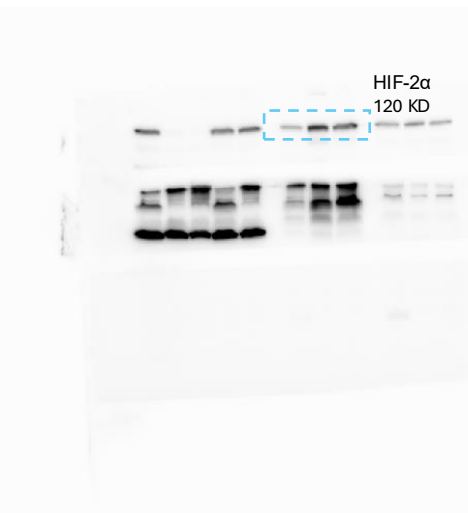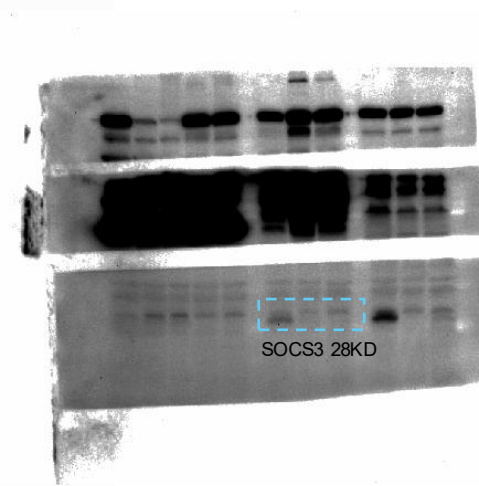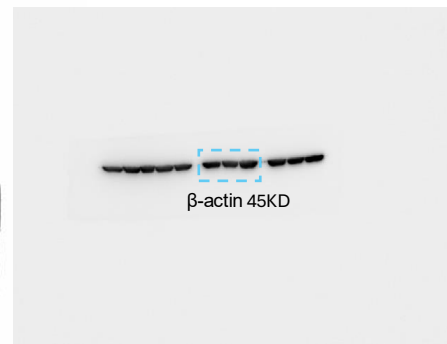

Full unedited blot/gel for Figure S2M

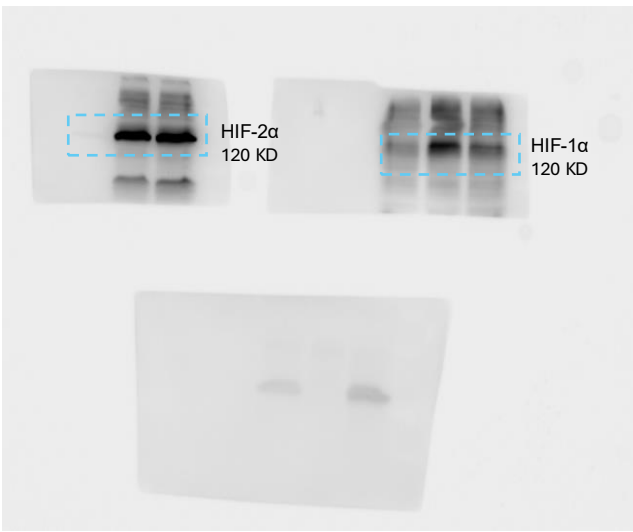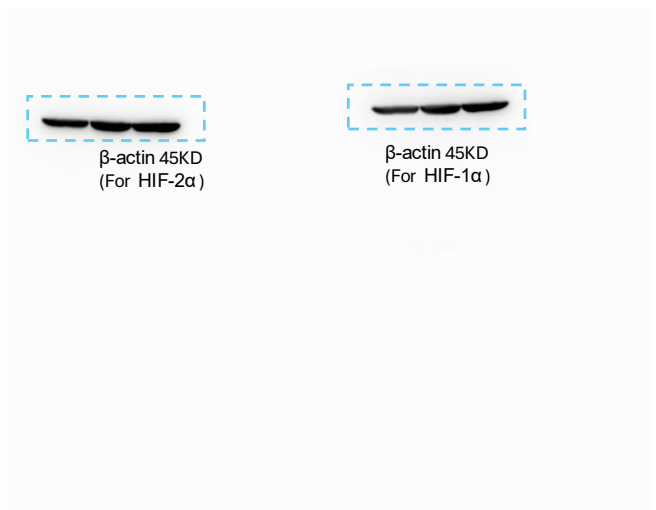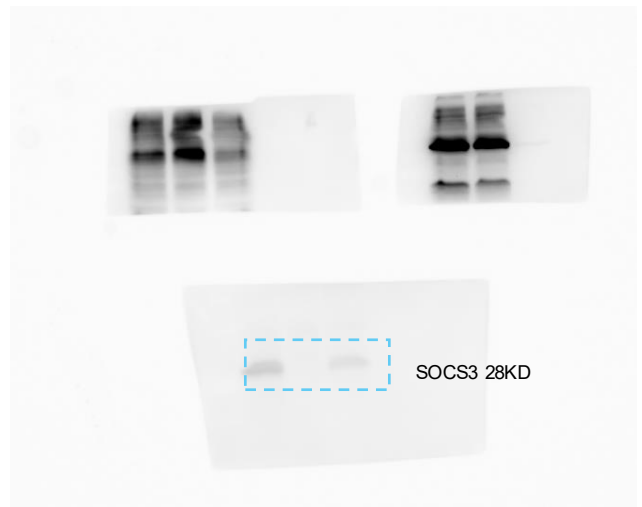

Full unedited blot/gel for Figure 3A

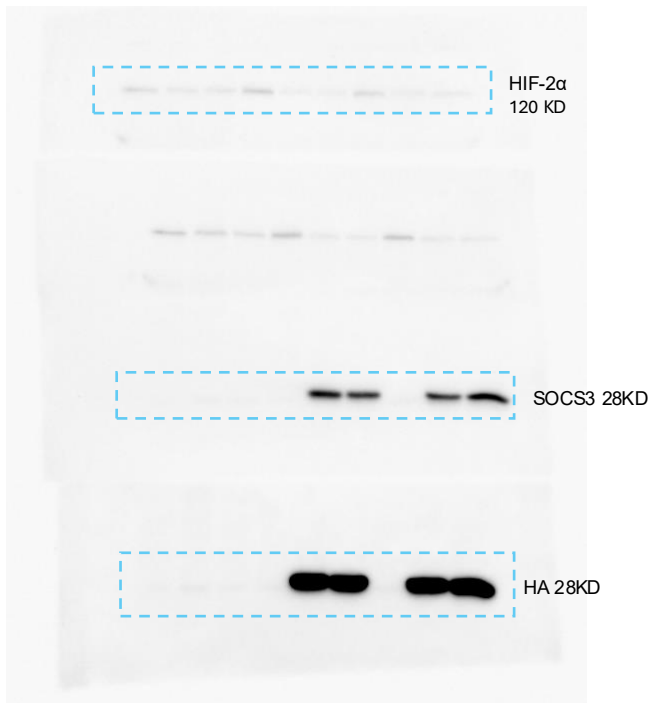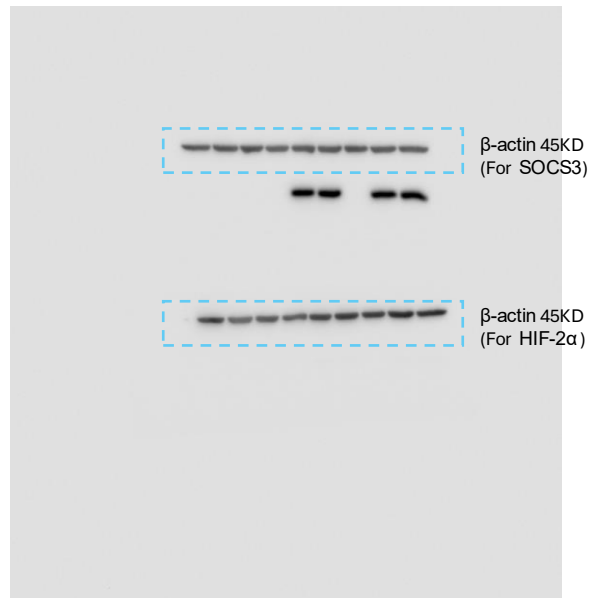

Full unedited blot/gel for Figure 3B

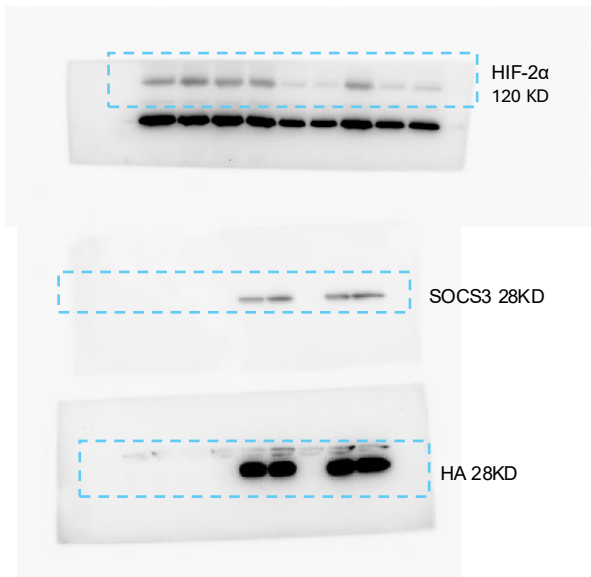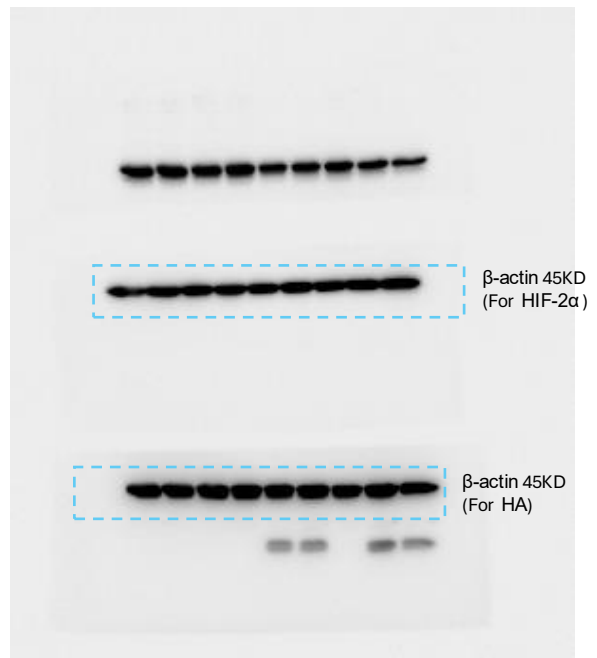

Full unedited blot/gel for Figure 3E

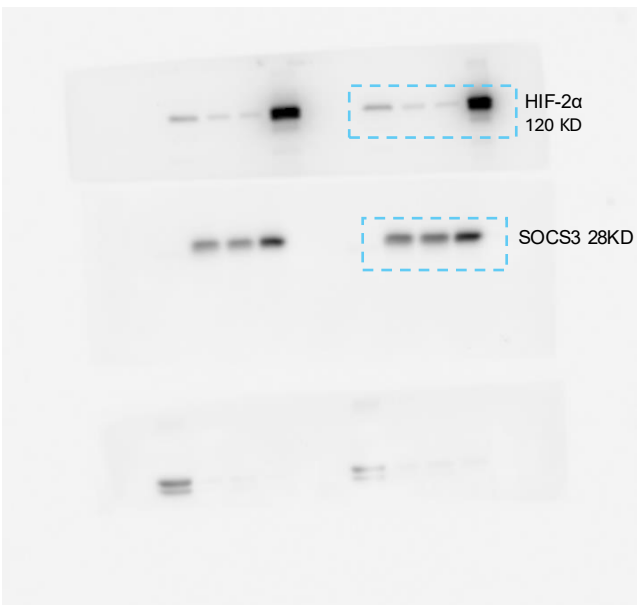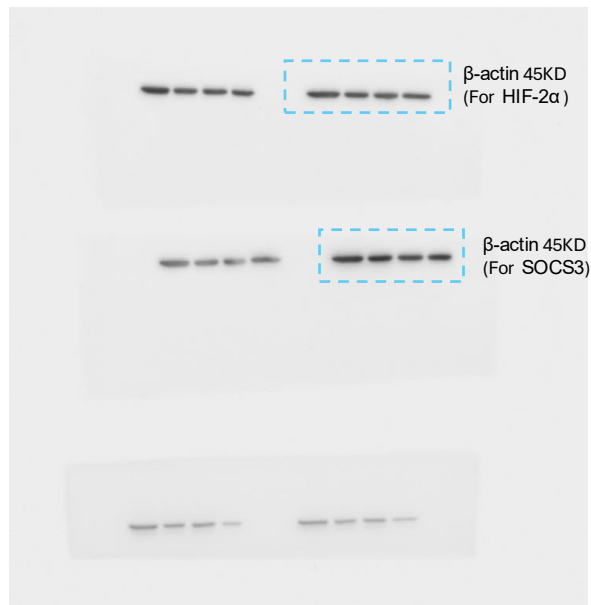

Full unedited blot/gel for Figure 3F

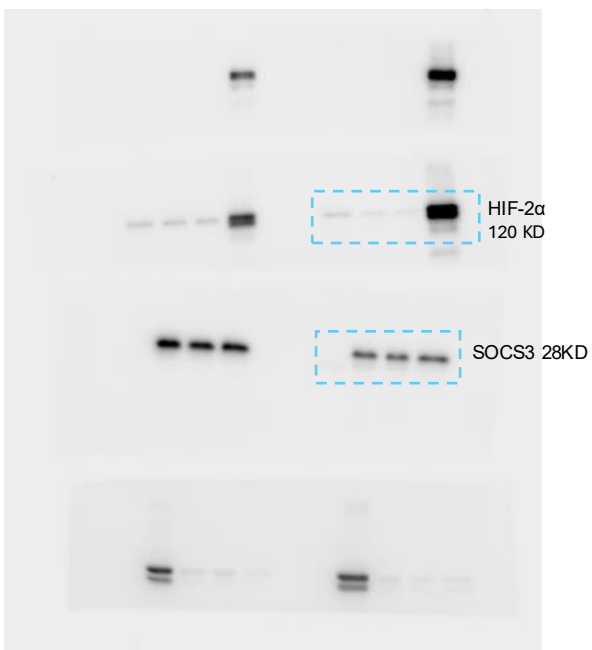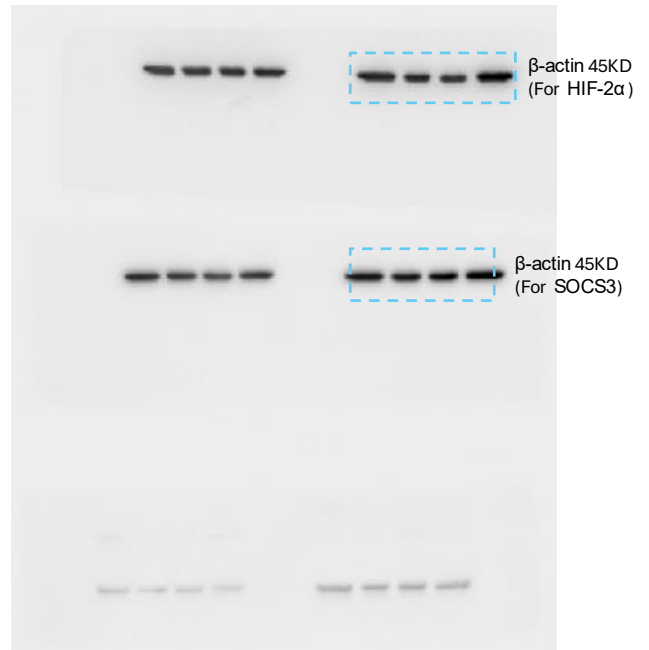

Full unedited blot/gel for Figure 3G

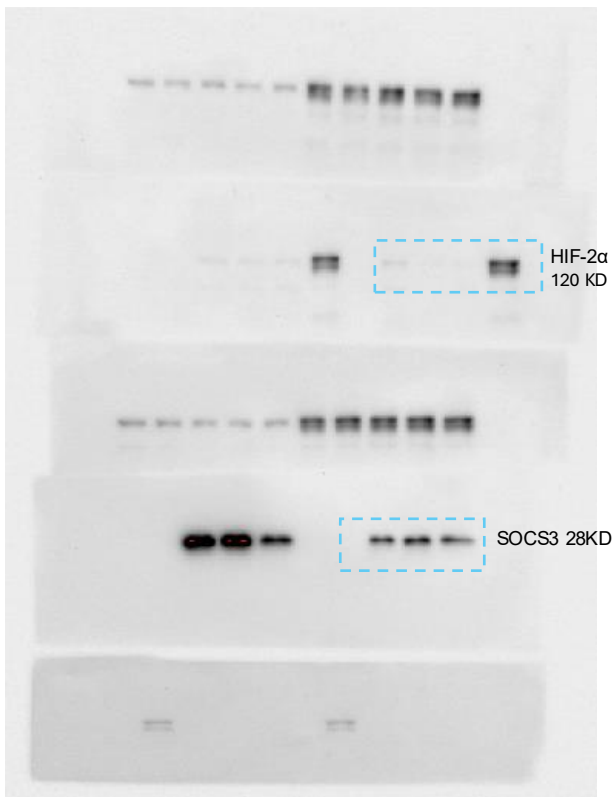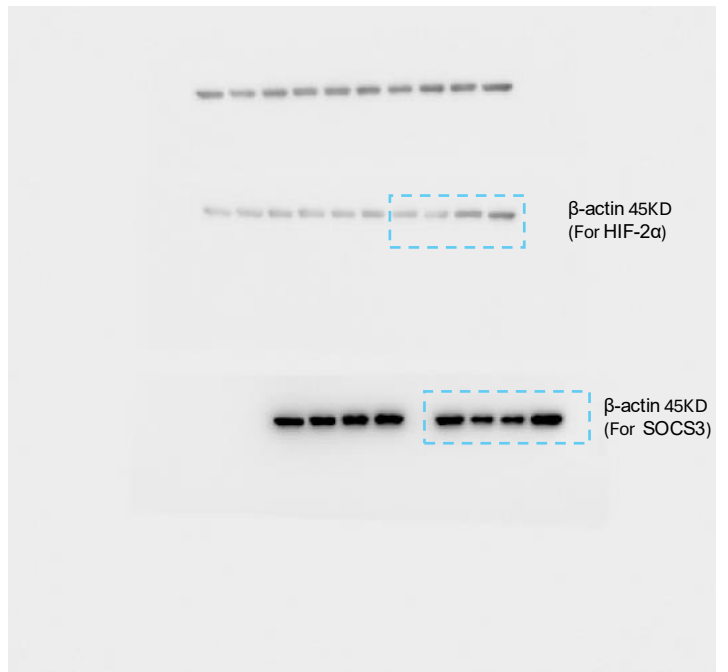

Full unedited blot/gel for Figure 3O

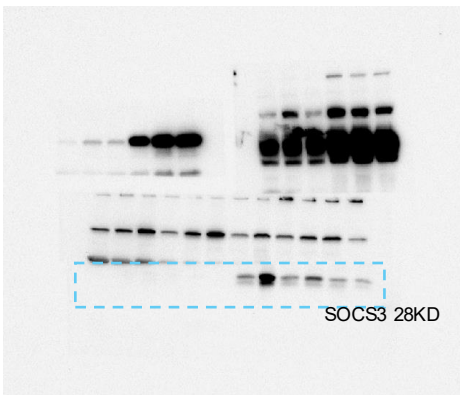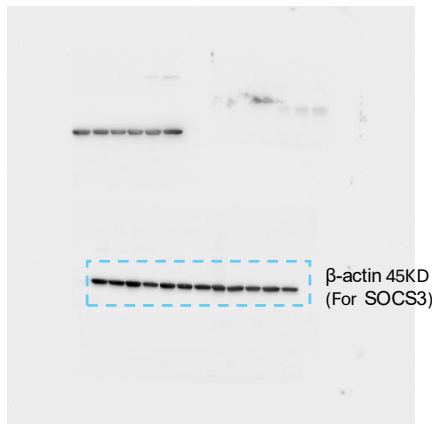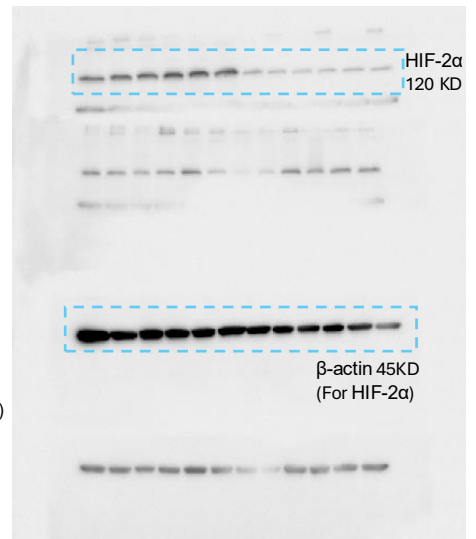

Full unedited blot/gel for Figure 3T

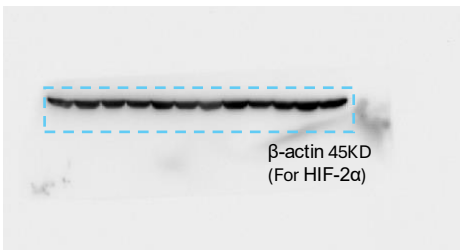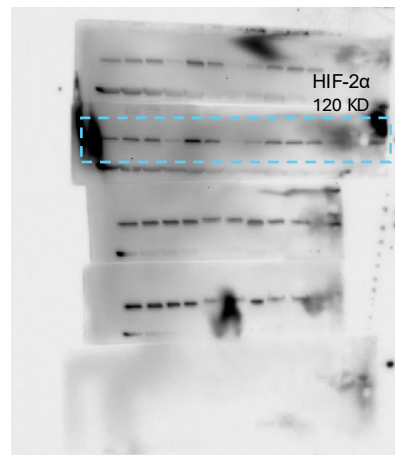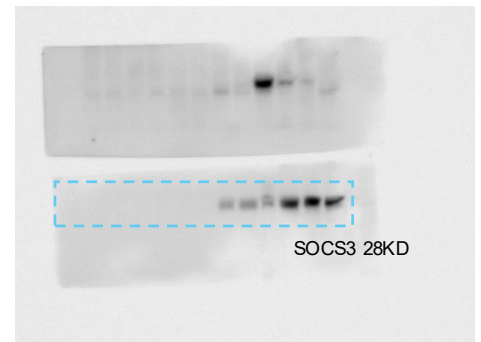

Full unedited blot/gel for Figure S3A

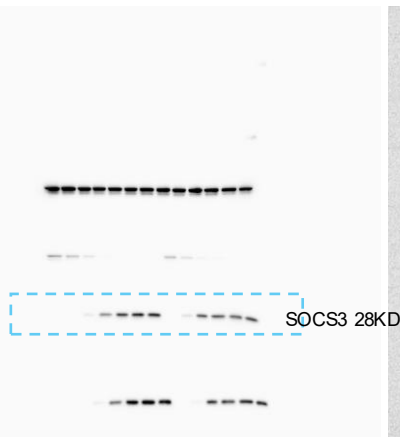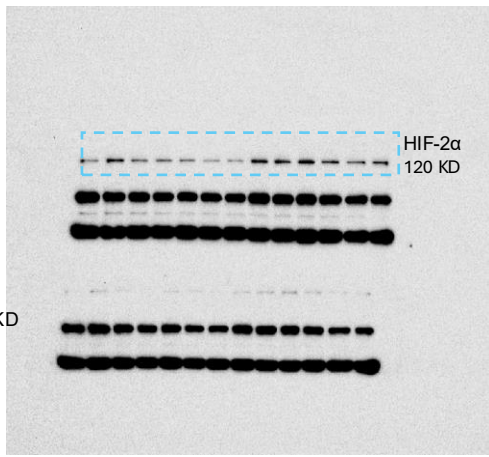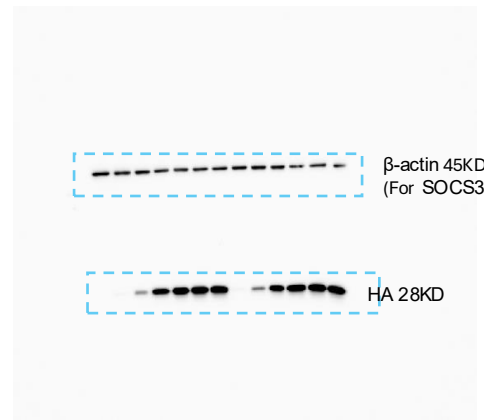

Full unedited blot/gel for Figure S3F

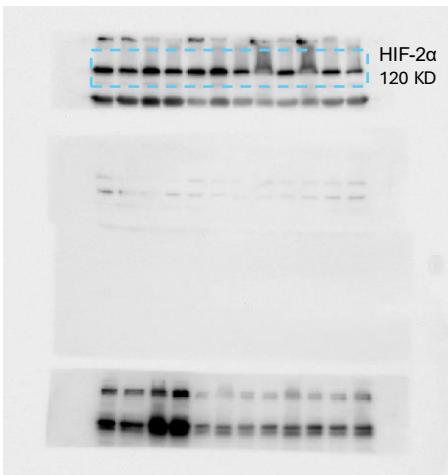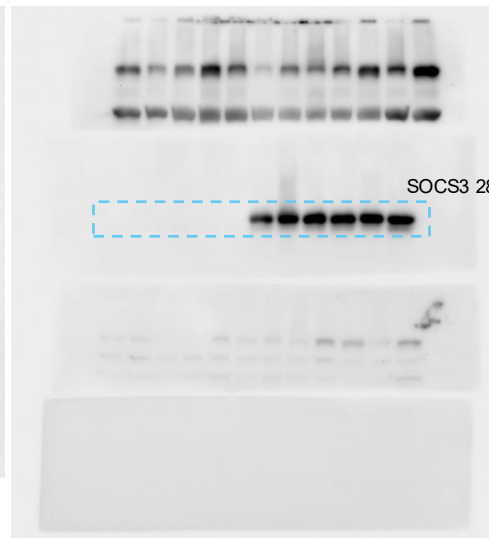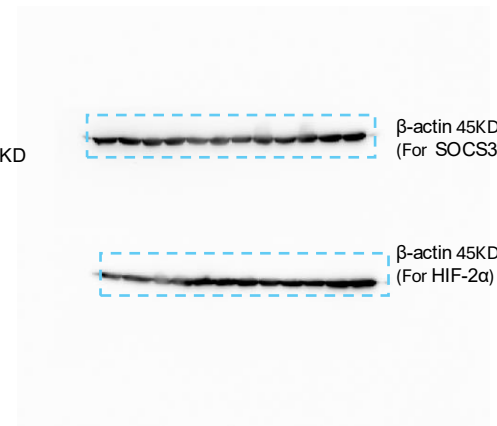

Full unedited blot/gel for Figure 4B

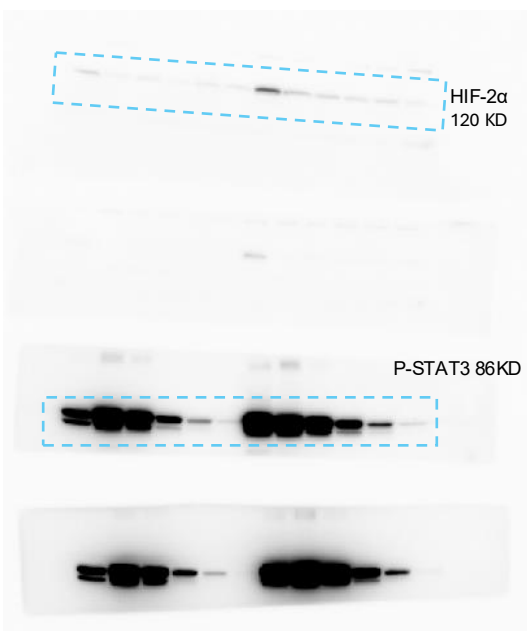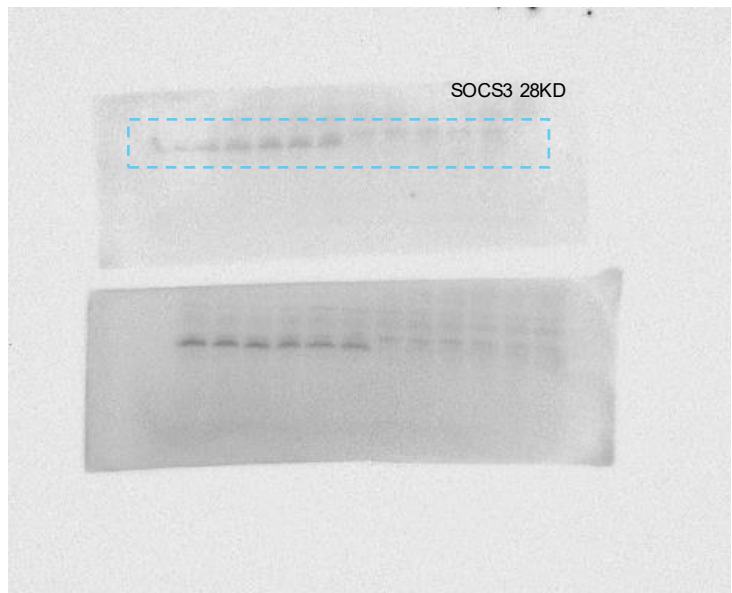

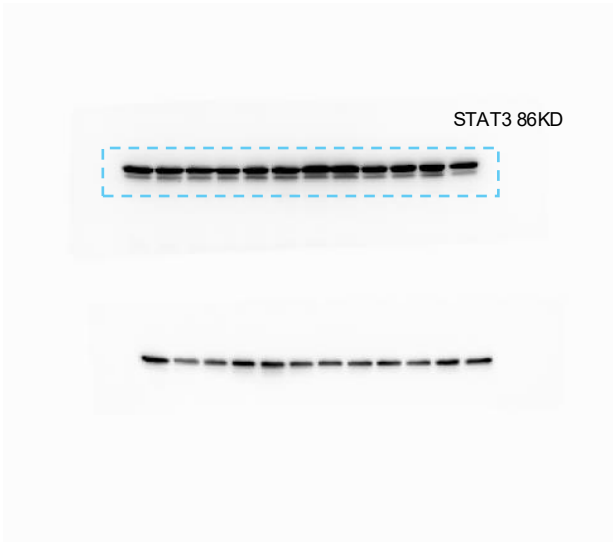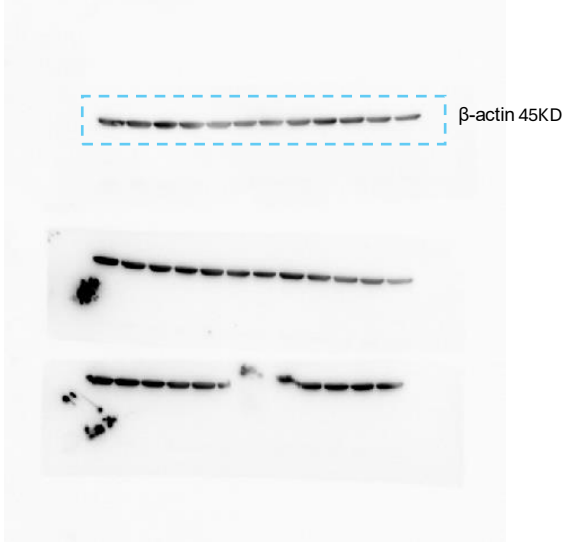

Full unedited blot/gel for Figure 4H

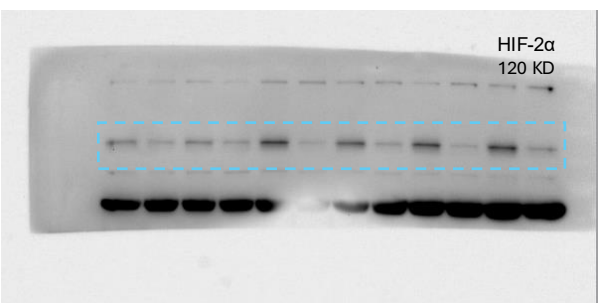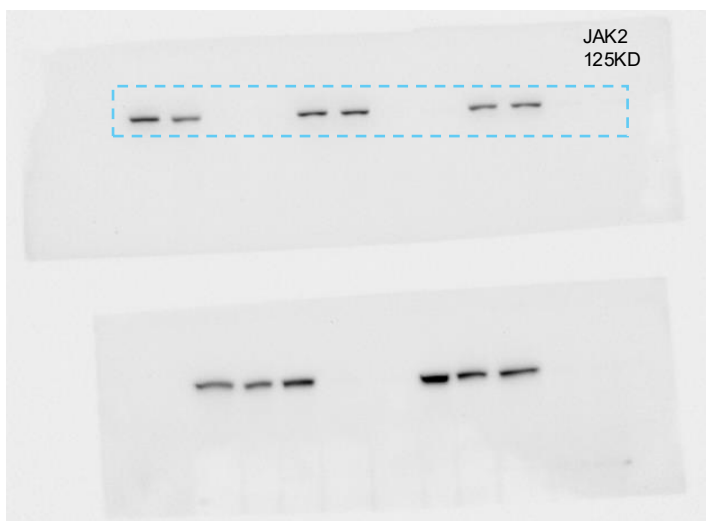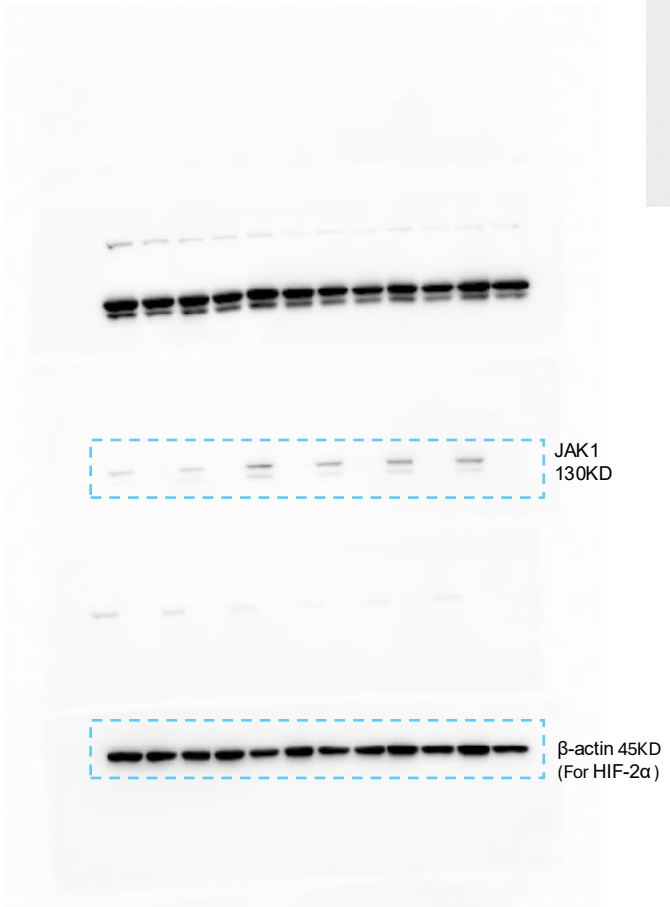

Full unedited blot/gel for Figure 4N

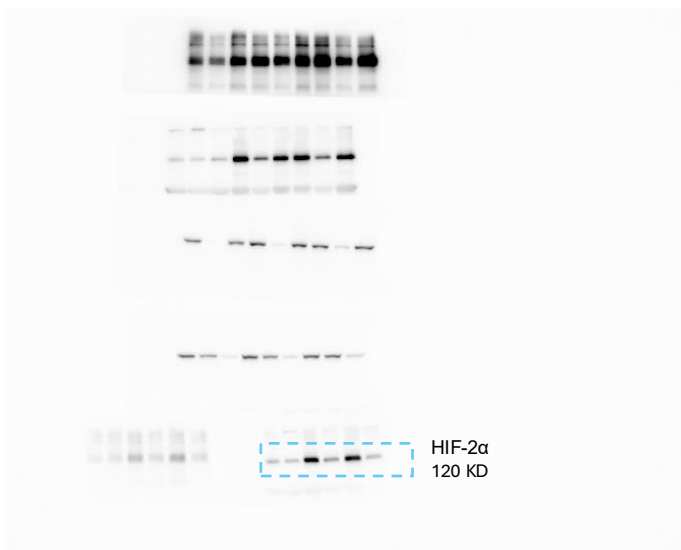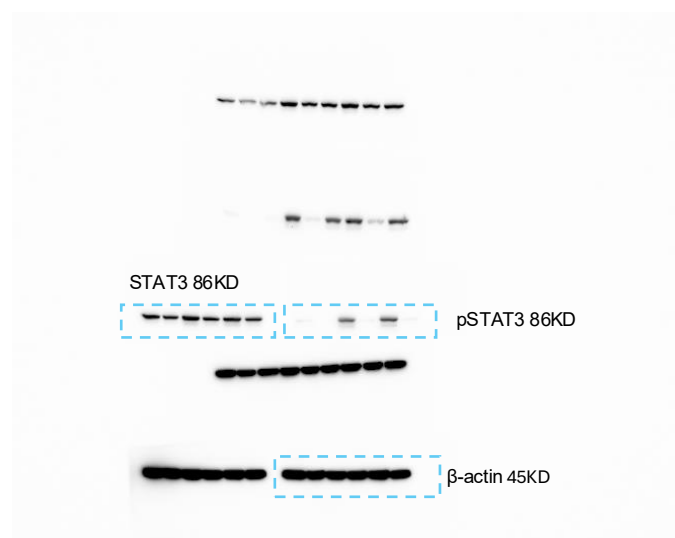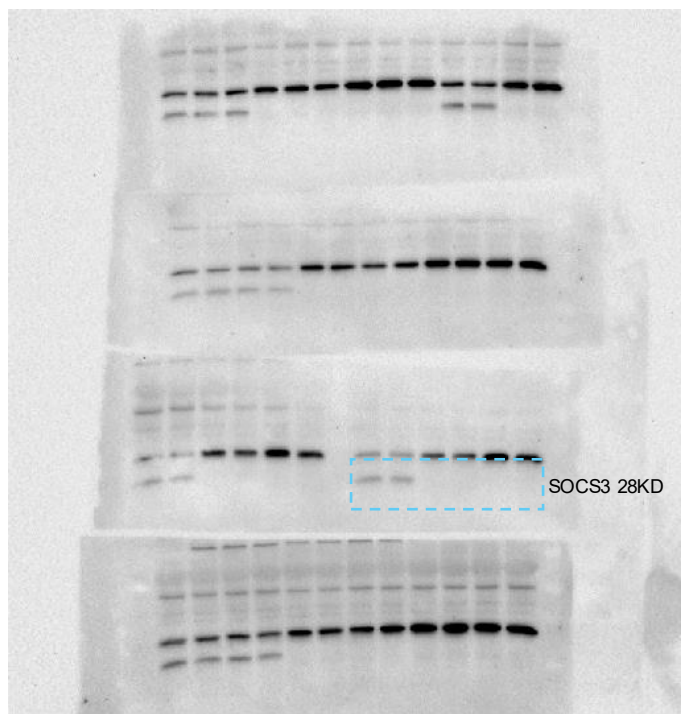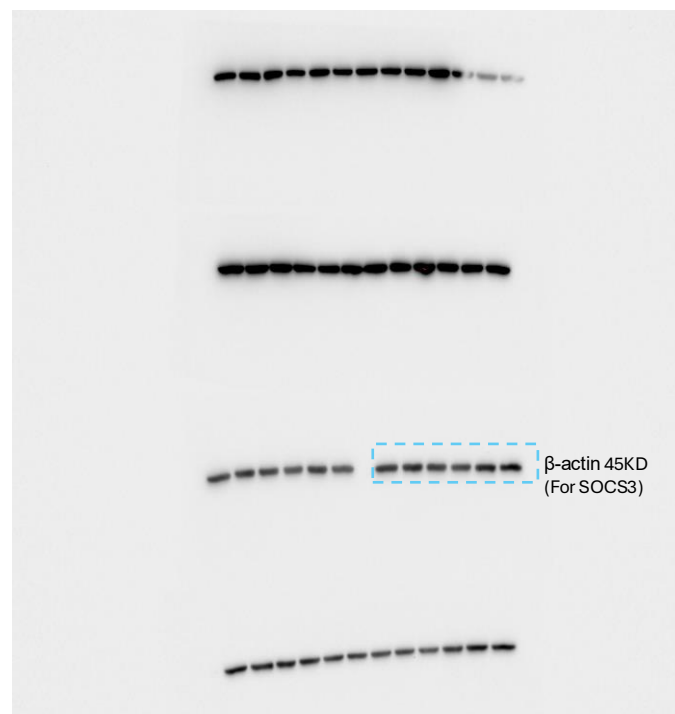

Full unedited blot/gel for Figure 4P

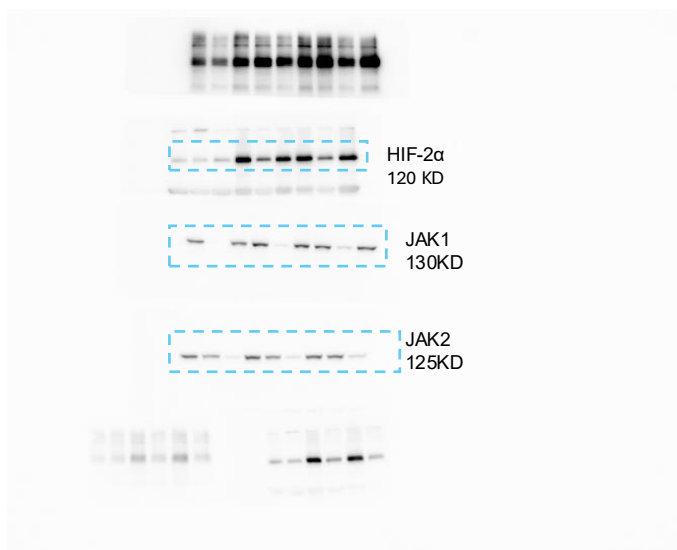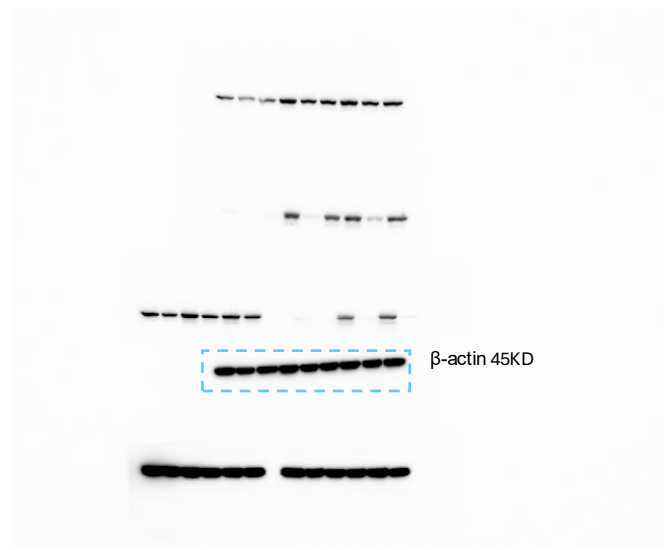

Full unedited blot/gel for Figure 4R

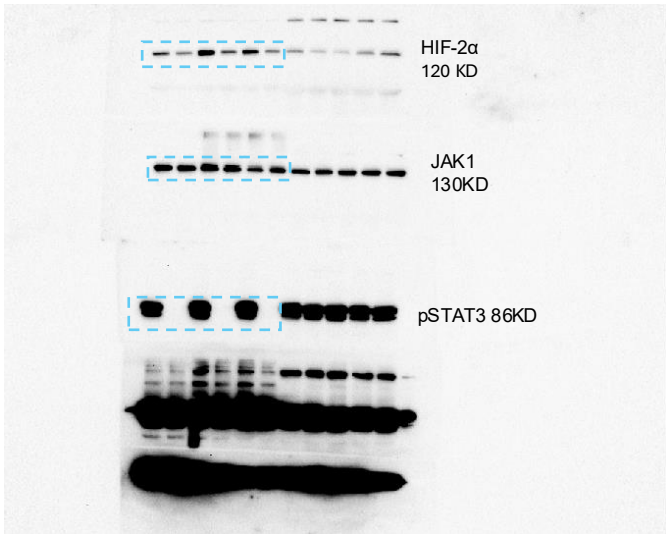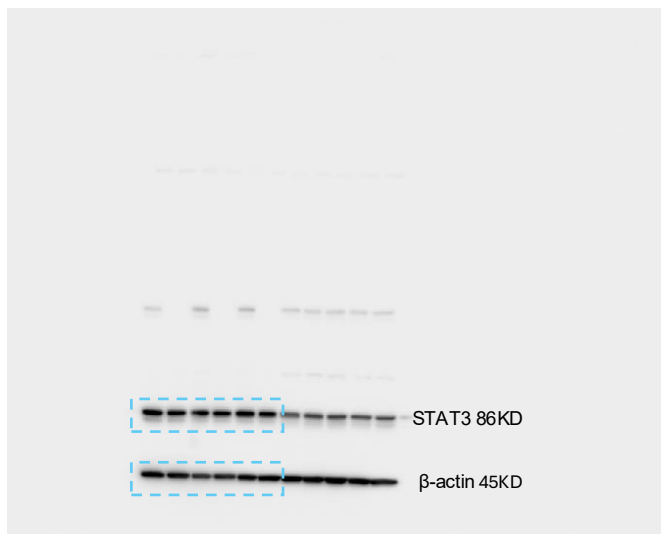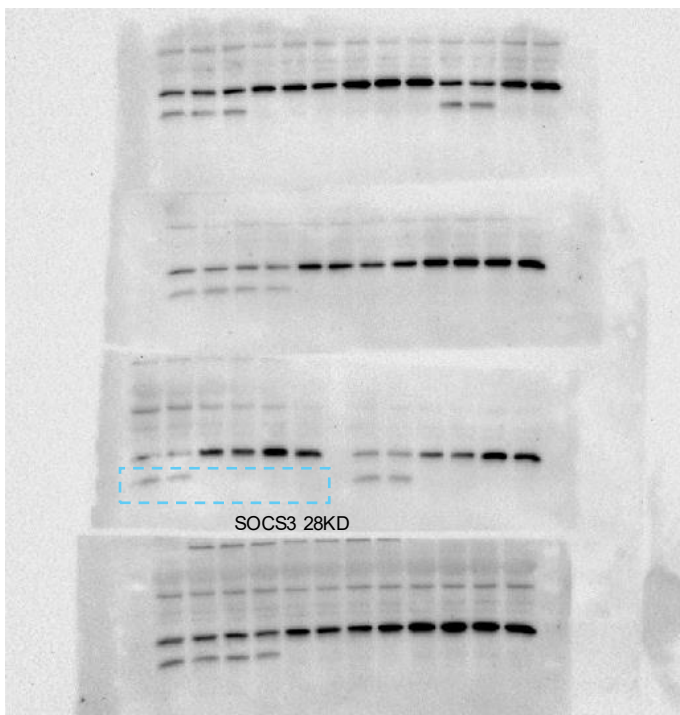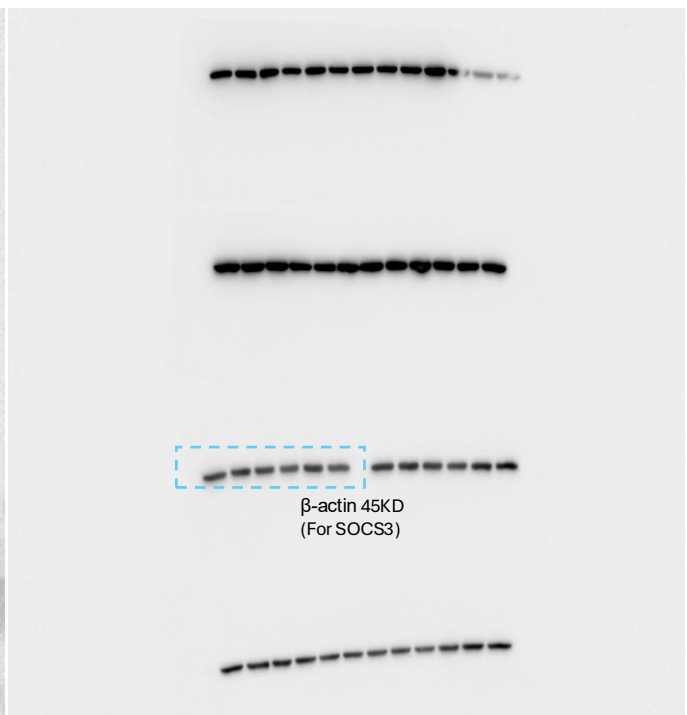

Full unedited blot/gel for Figure 4T

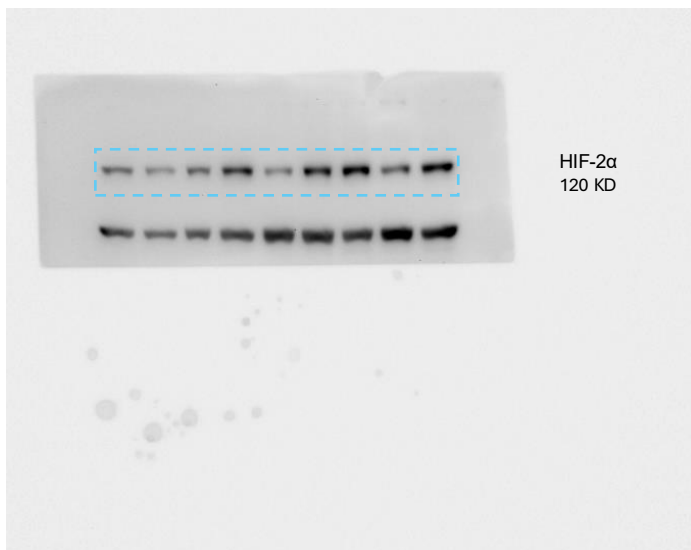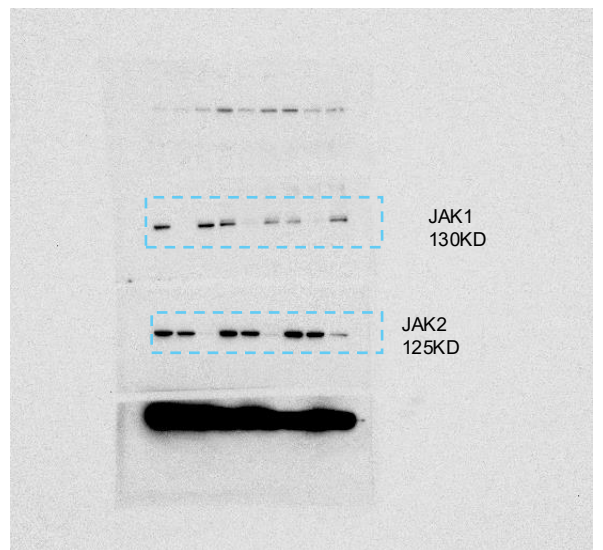

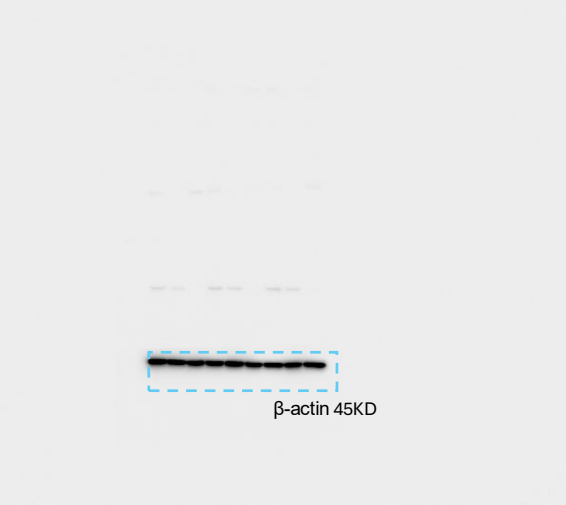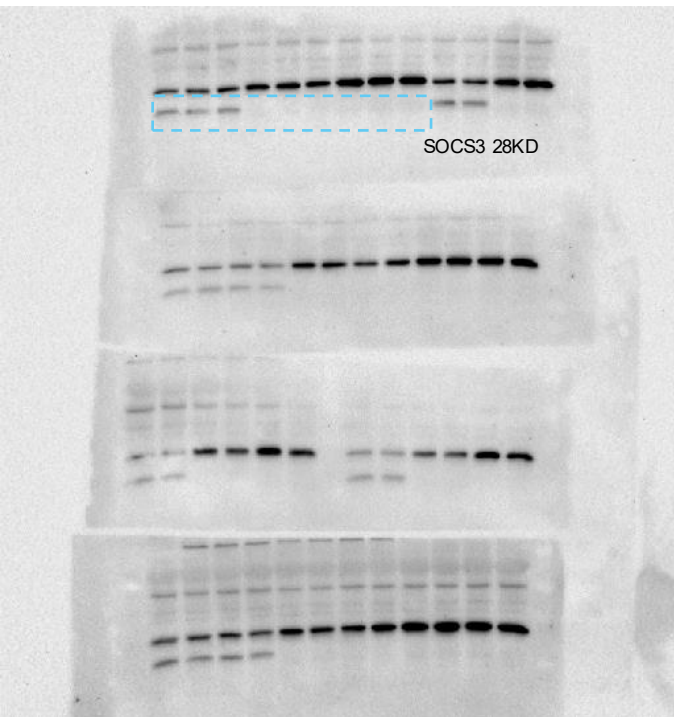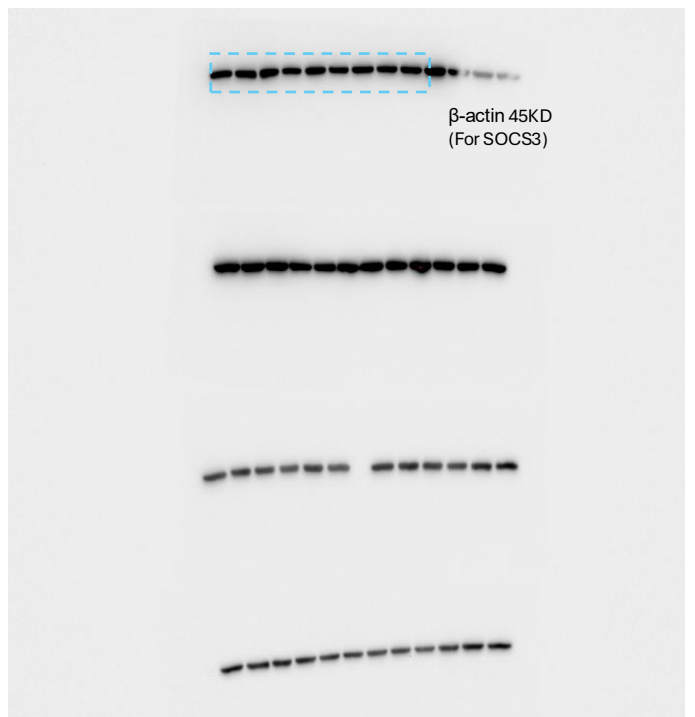

Full unedited blot/gel for Figure S4C

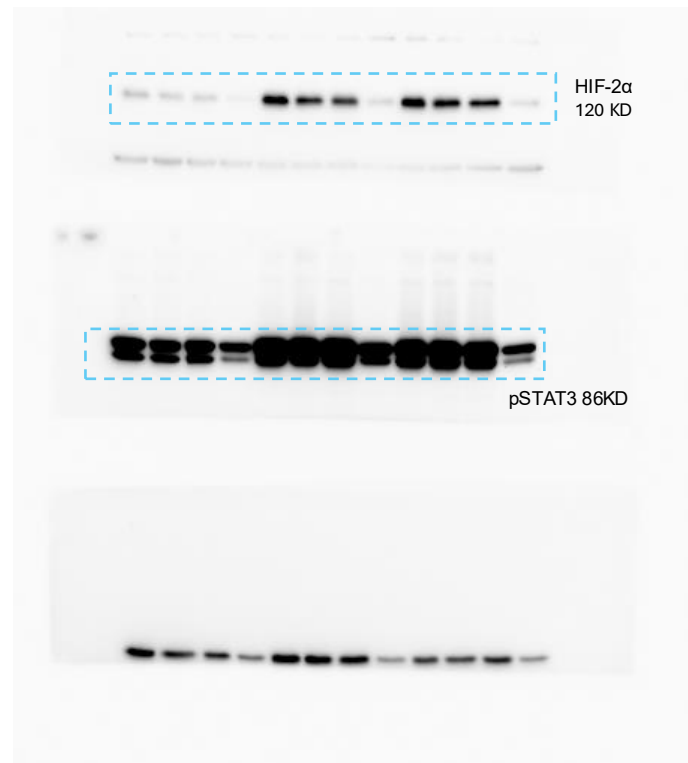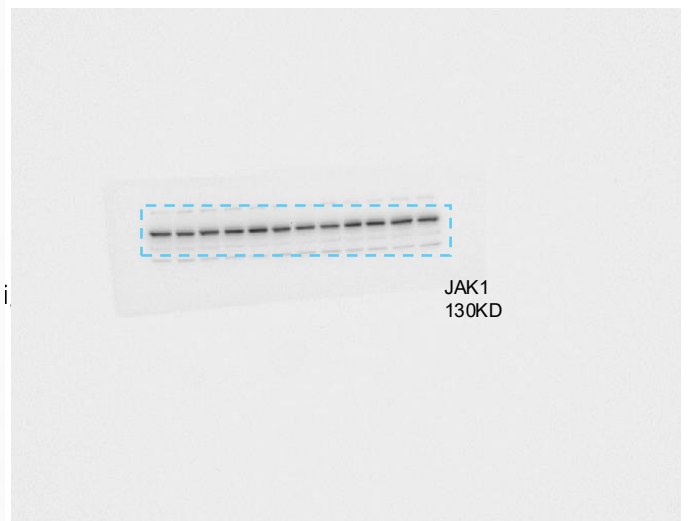

STAT3 86KD

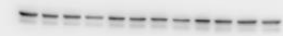

$\beta$ -actin 45KD

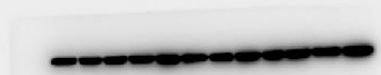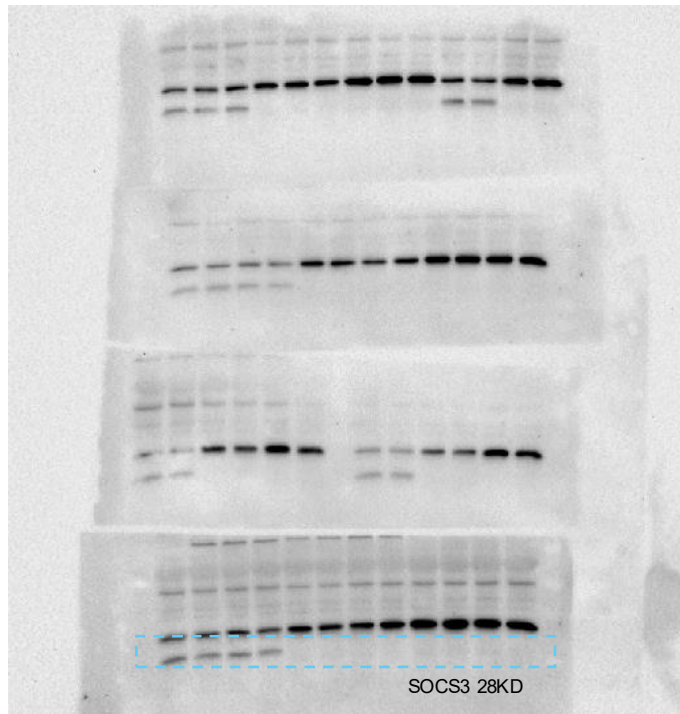

SOCS3 28KD

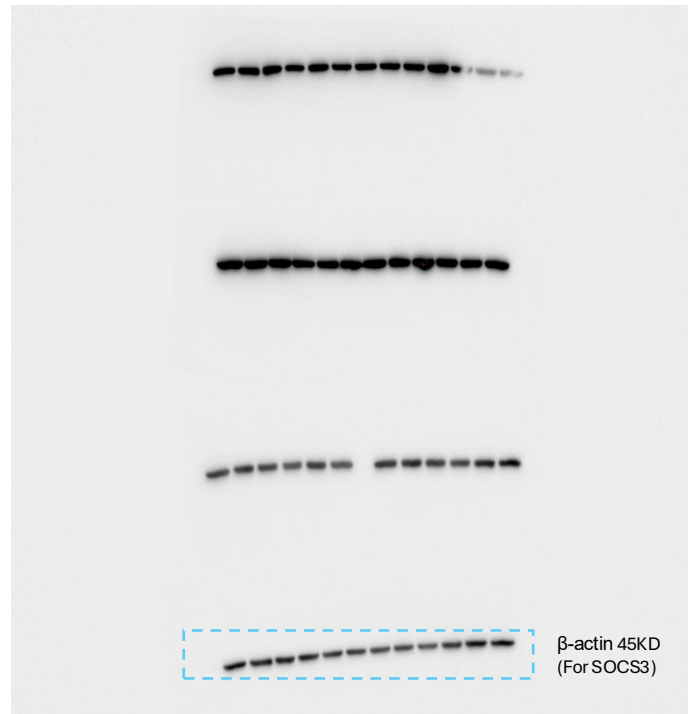

$\beta$ -actin 45KD  
(For SOCS3)

Full unedited blot/gel for Figure S4D

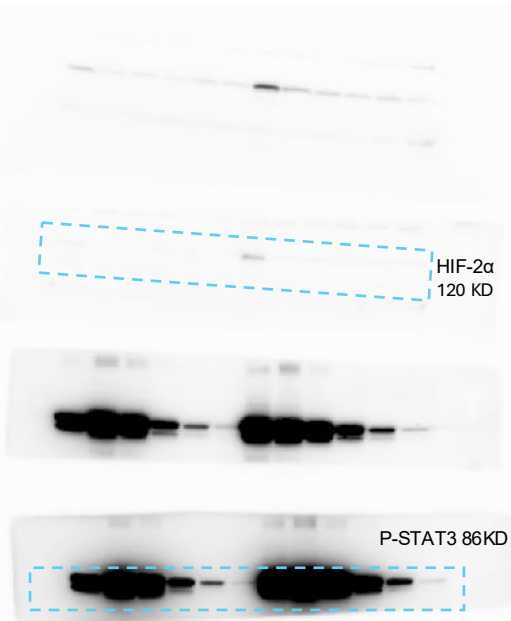

HIF-2 $\alpha$   
120 KD

P-STAT3 86KD

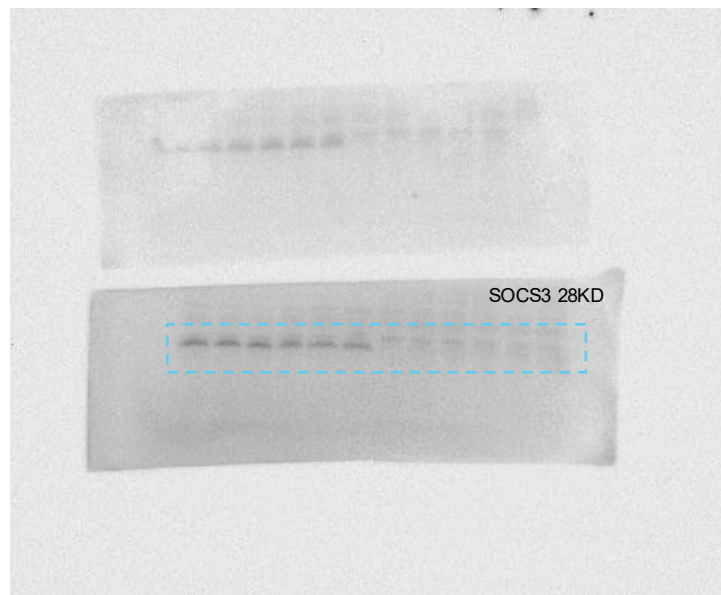

SOCS3 28KD

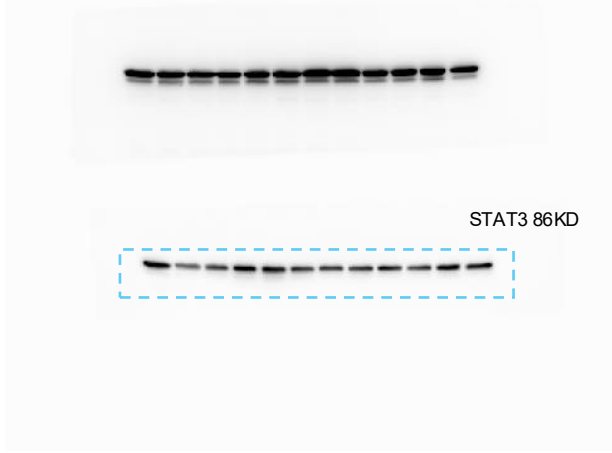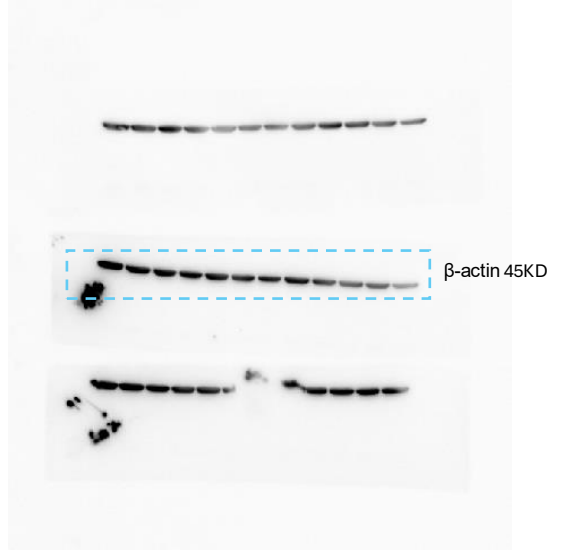

Full unedited blot/gel for Figure S4F

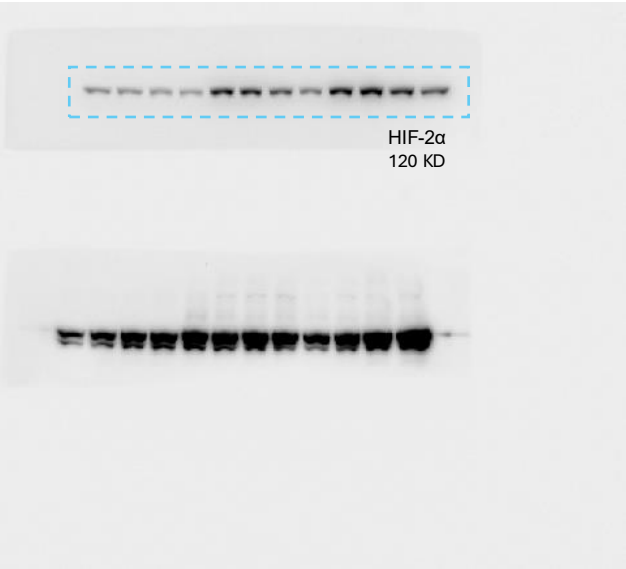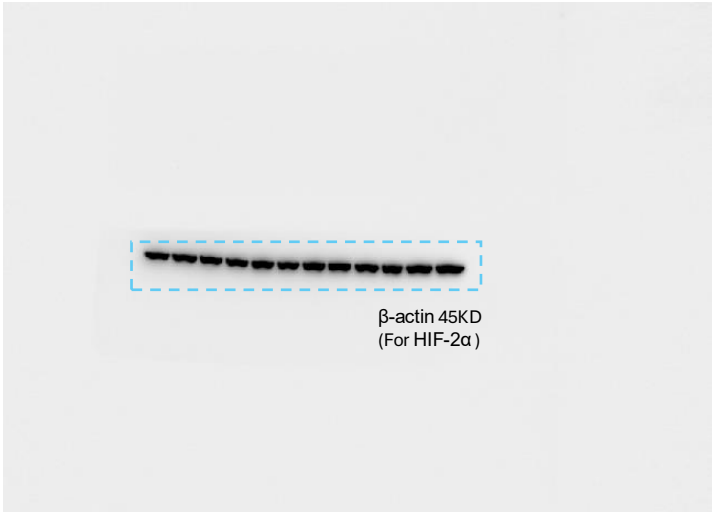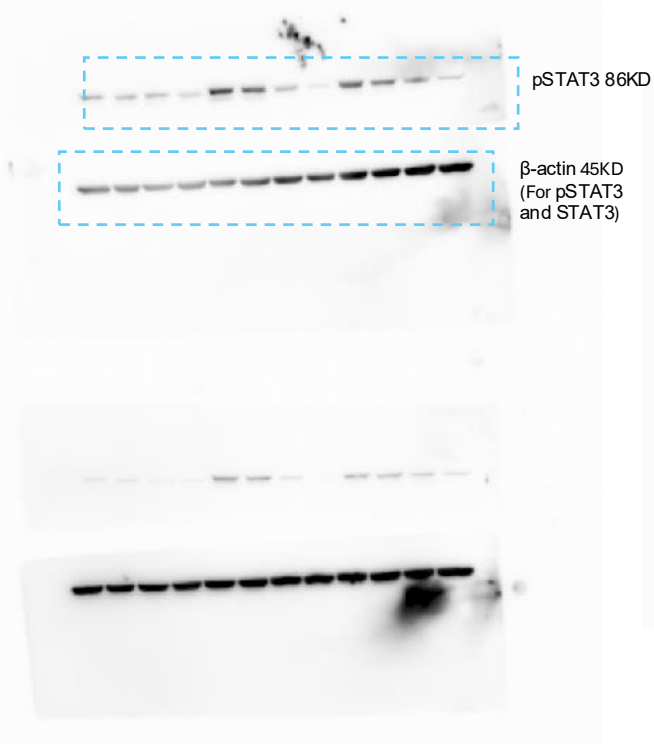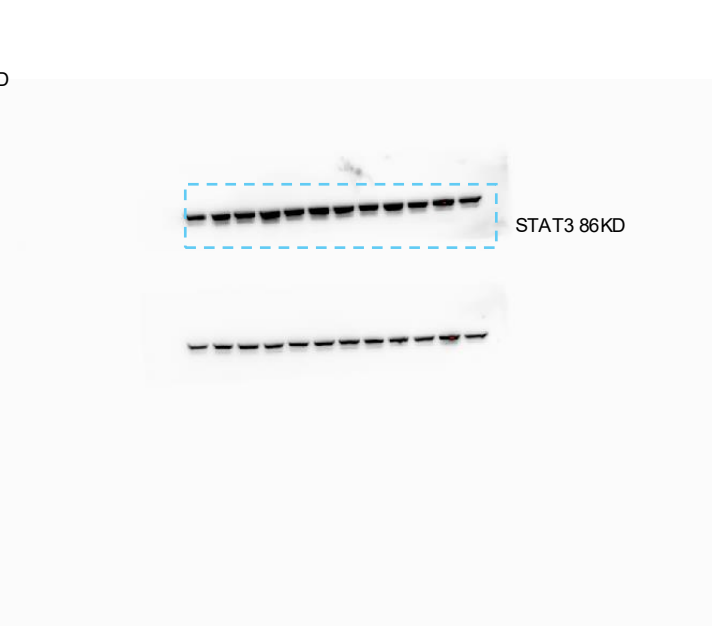

Full unedited blot/gel for Figure S4G

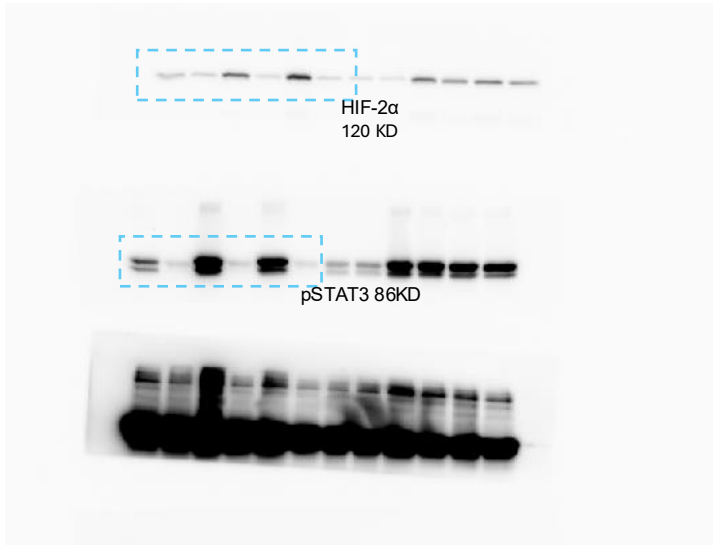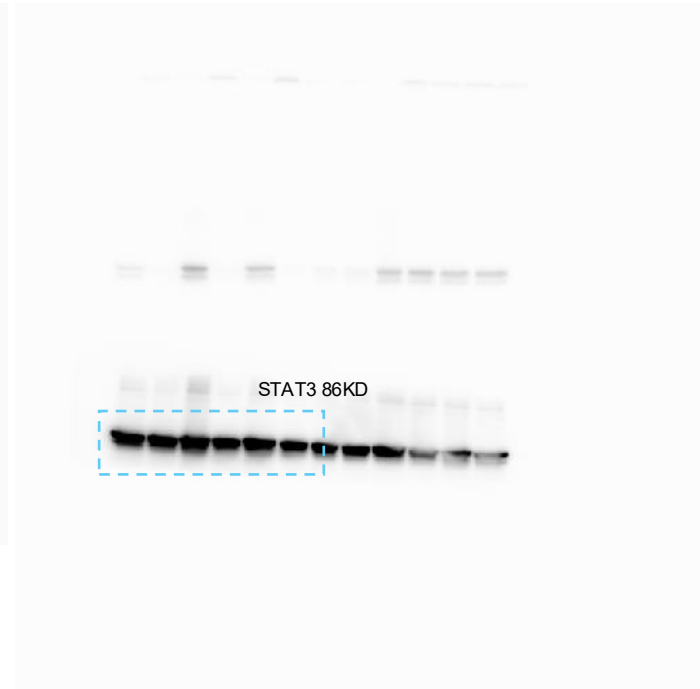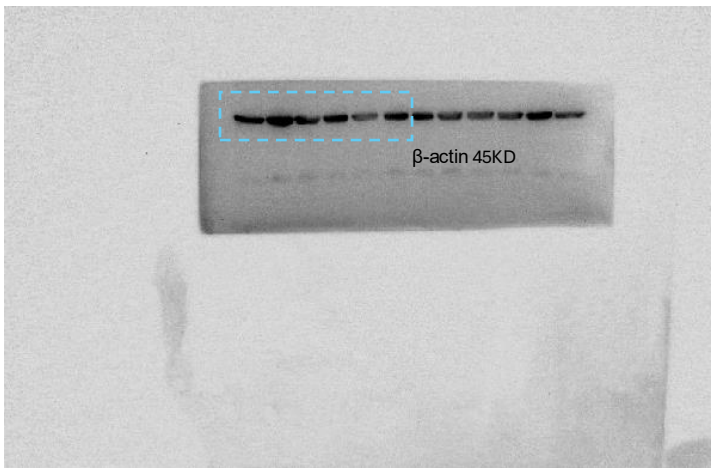

Full unedited blot/gel for Figure 5B

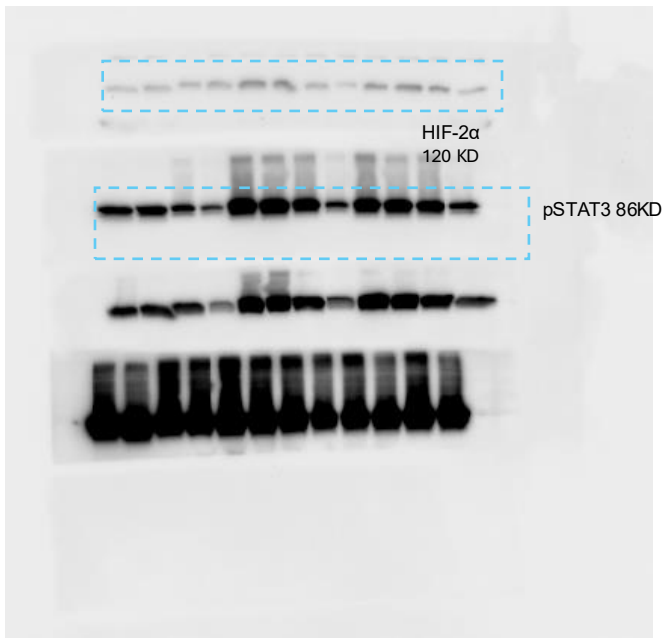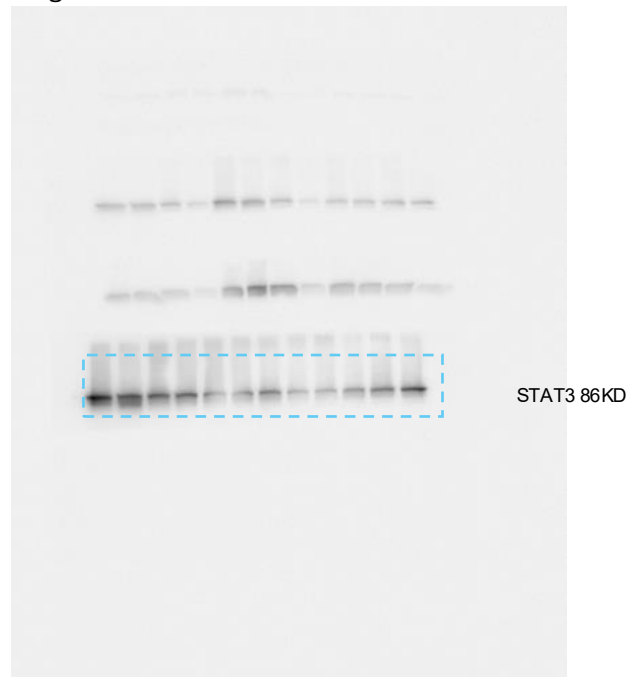

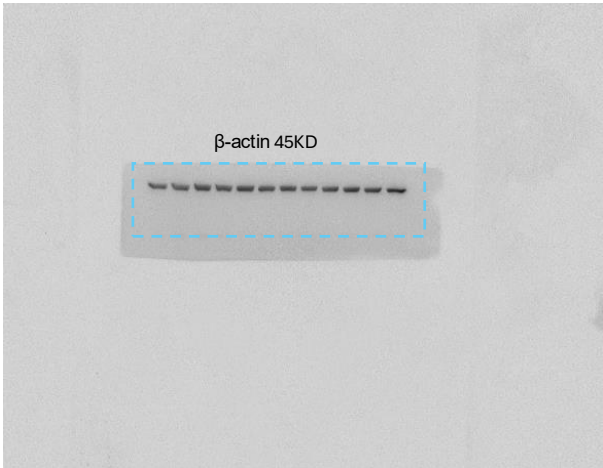

Full unedited blot/gel for Figure 5G

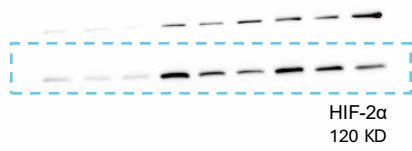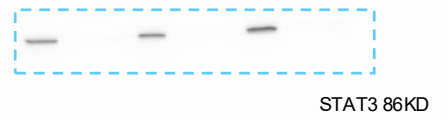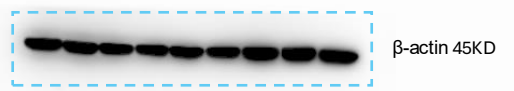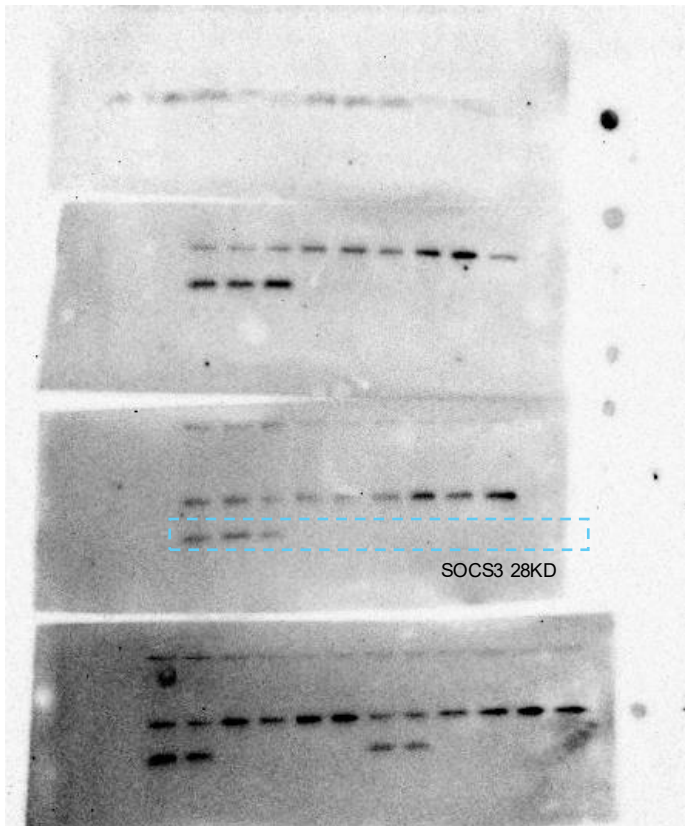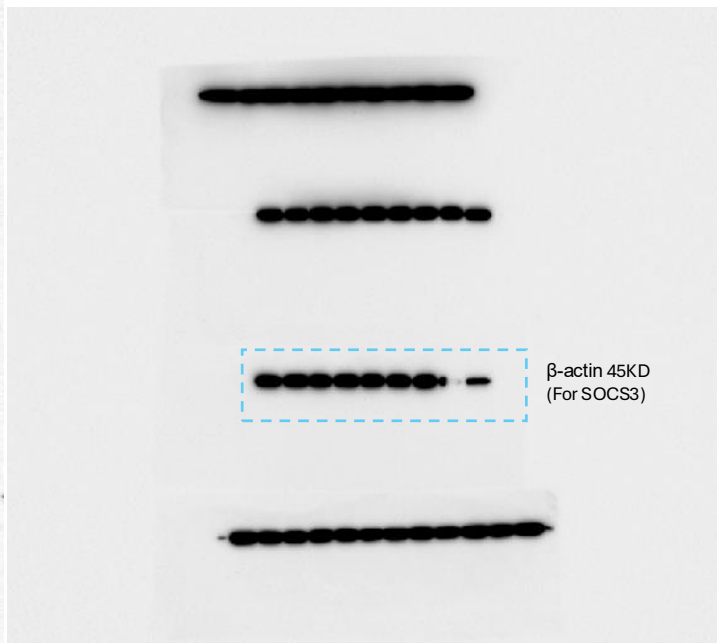

Full unedited blot/gel for Figure 5K

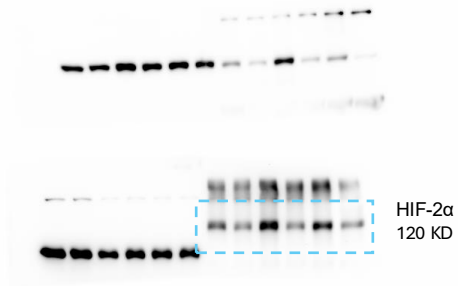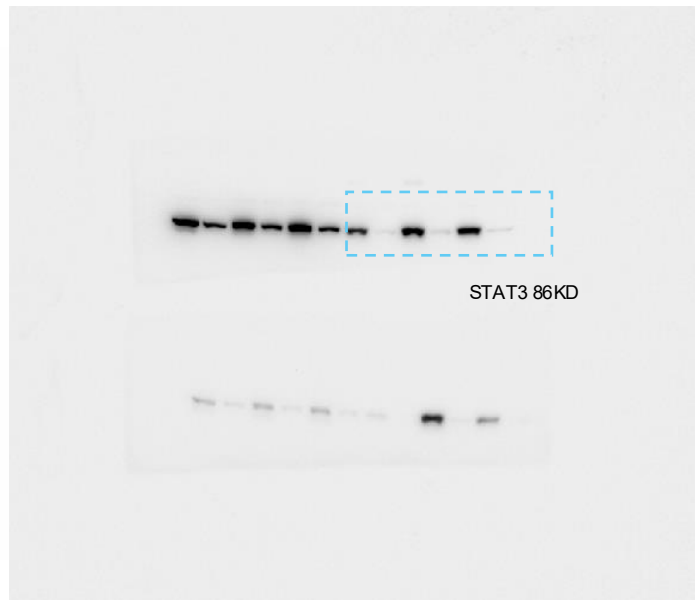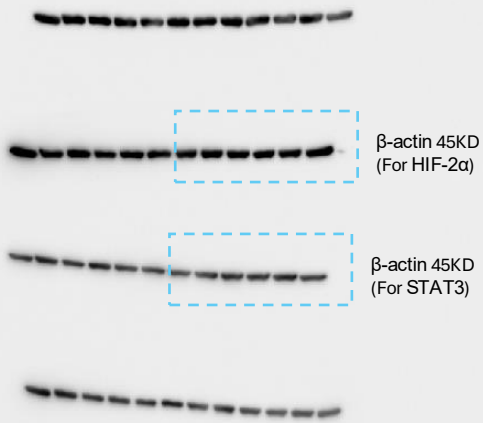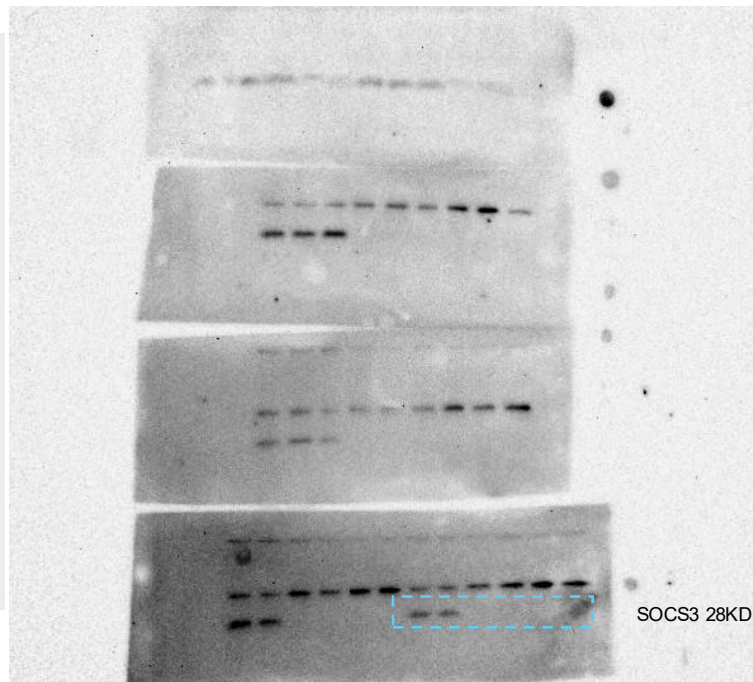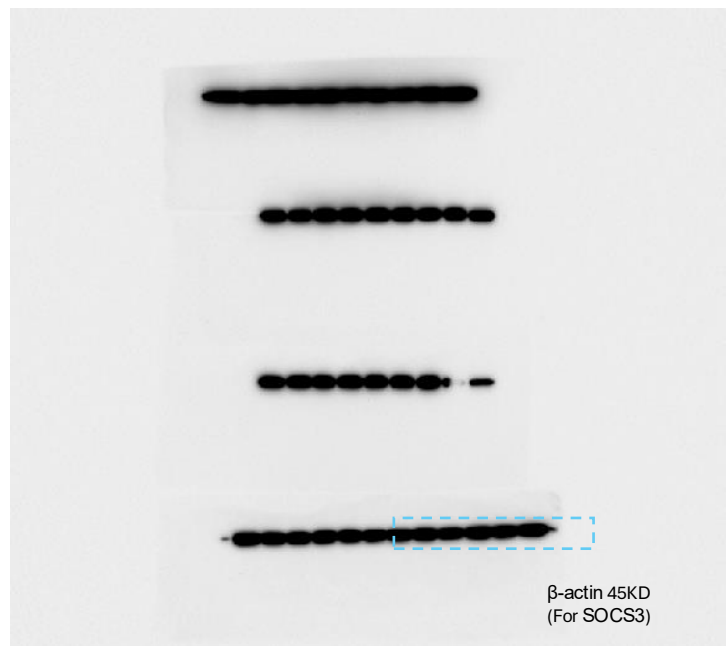

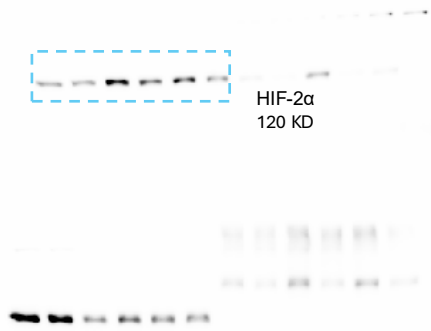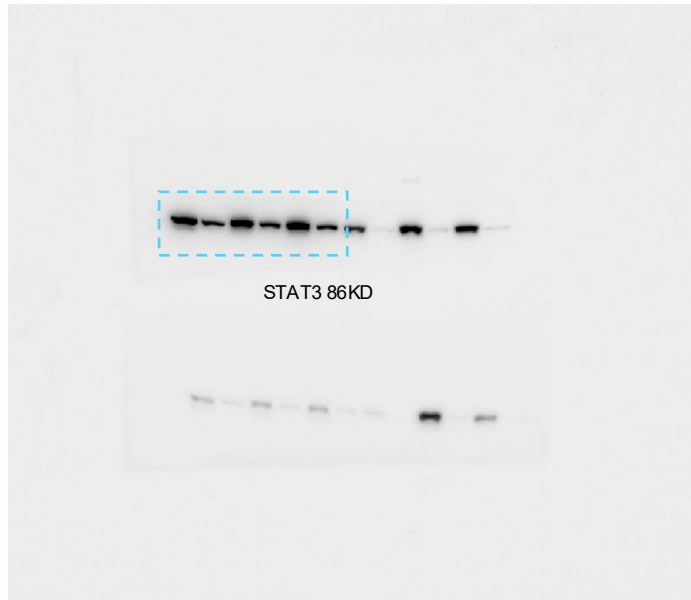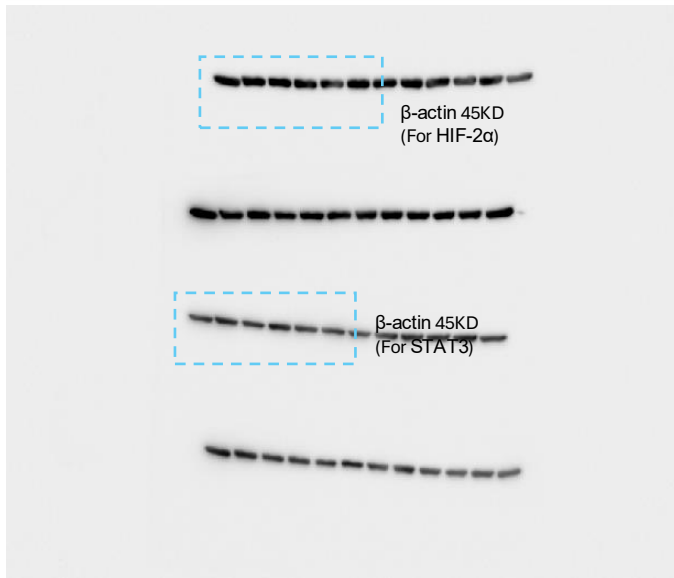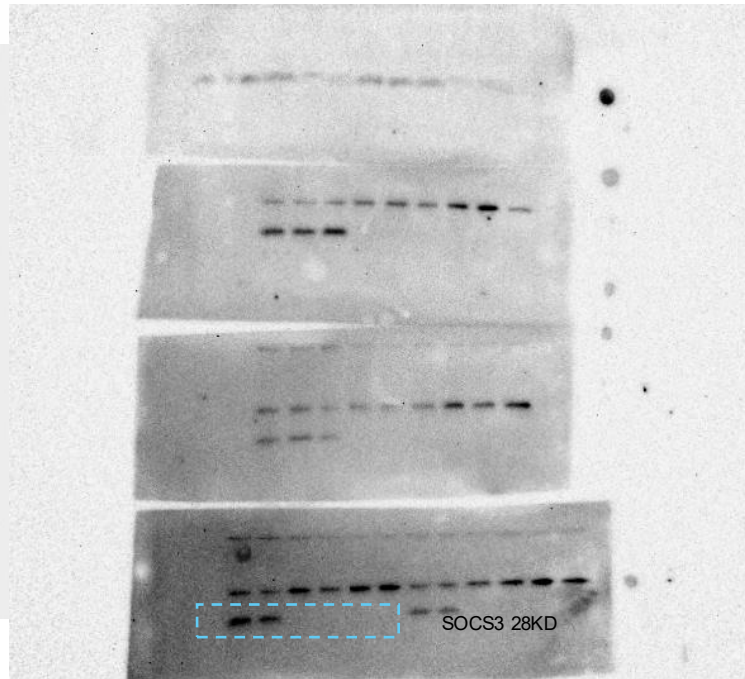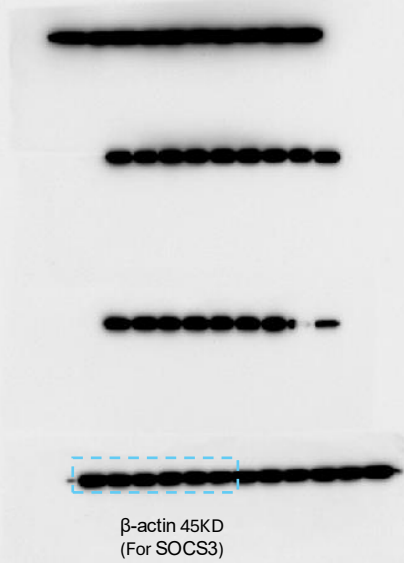

Full unedited blot/gel for Figure 5M

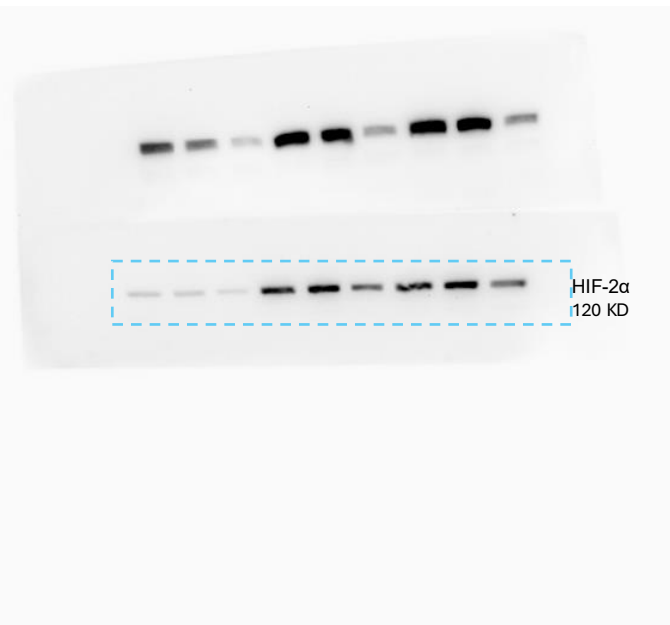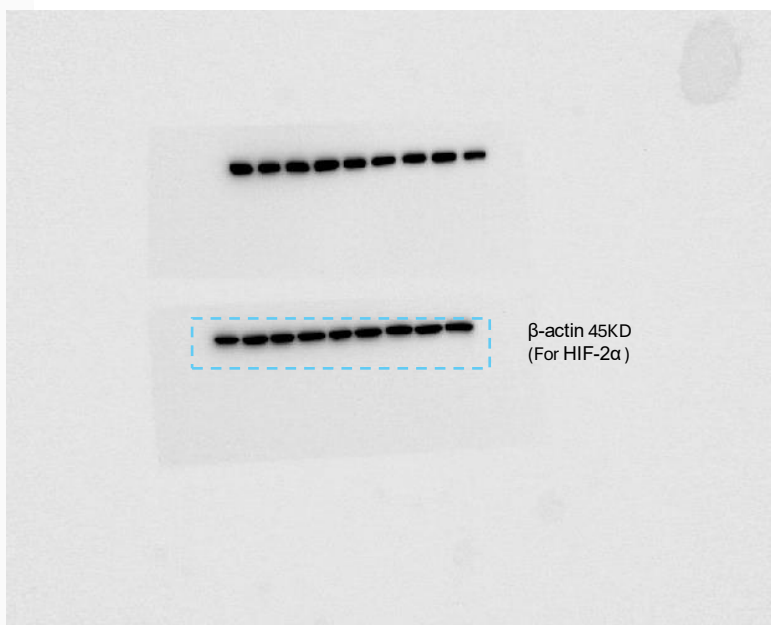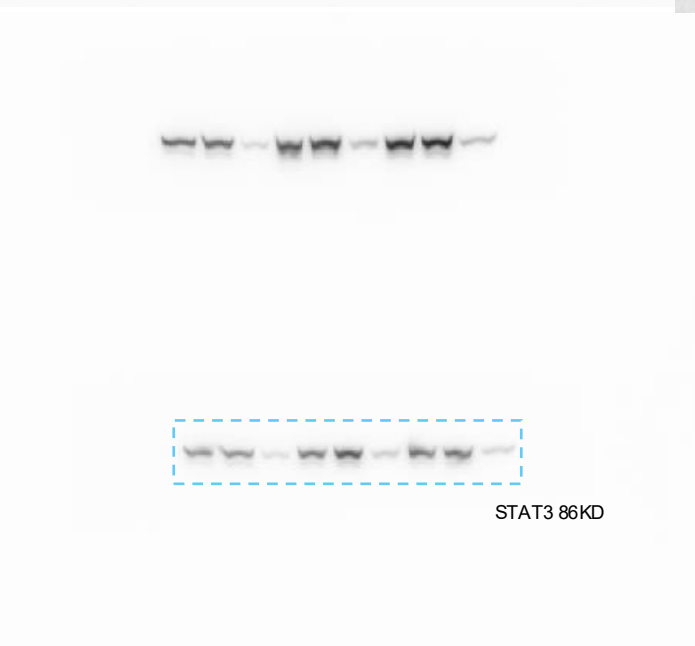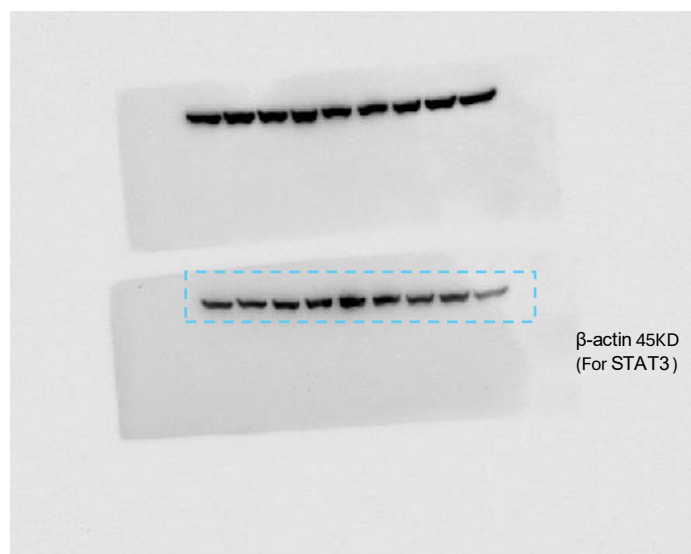

Full unedited blot/gel for Figure 5Q

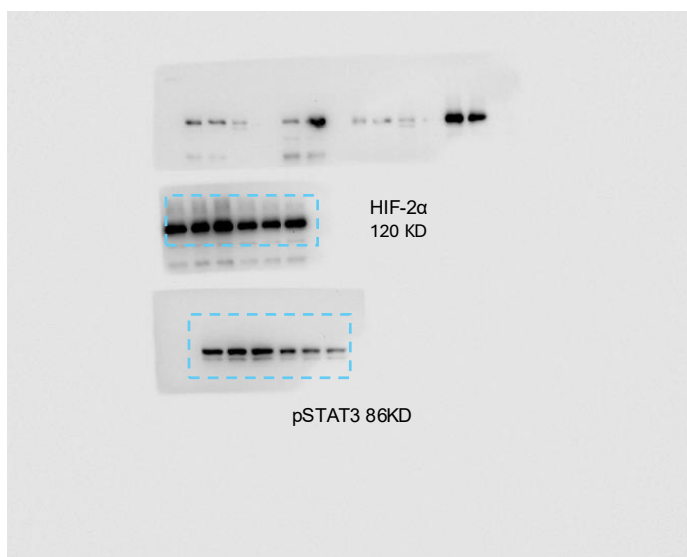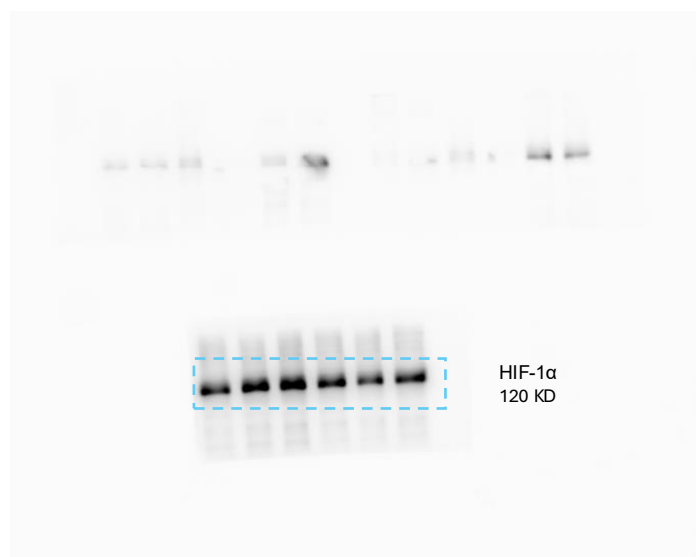

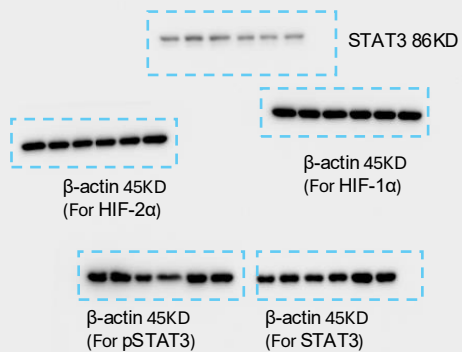

Full unedited blot/gel for Figure S5E

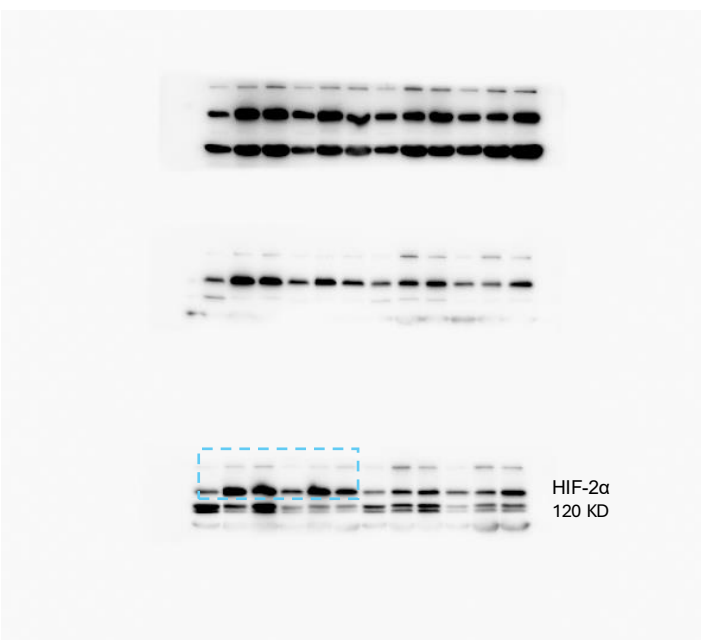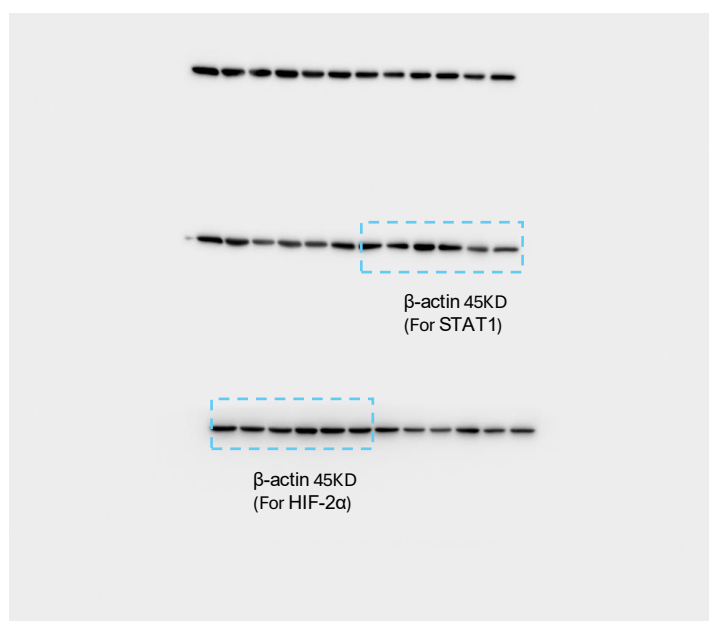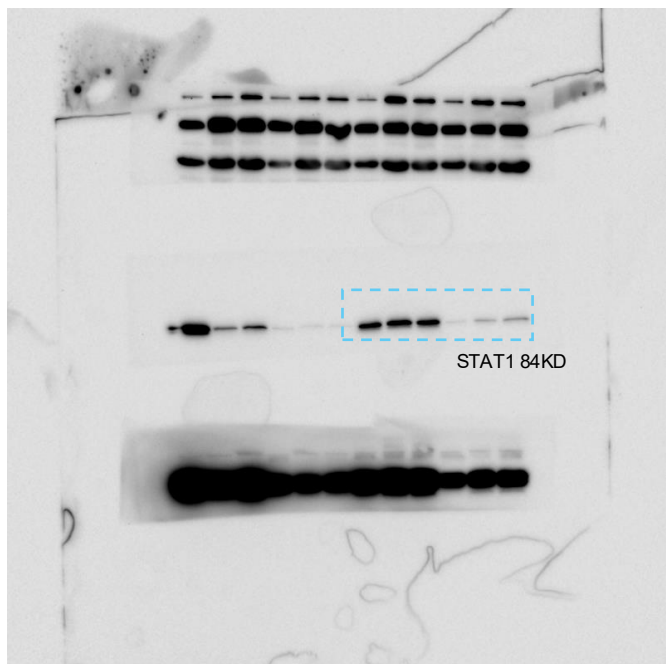

Full unedited blot/gel for Figure S5F

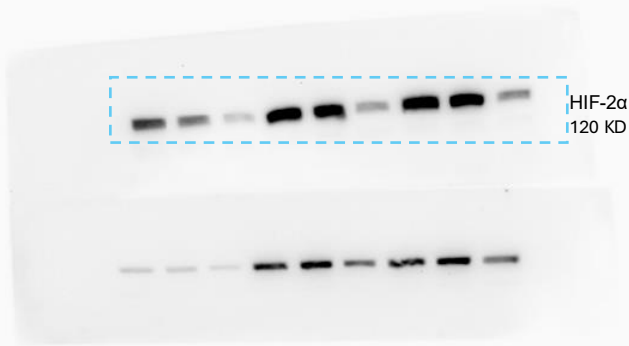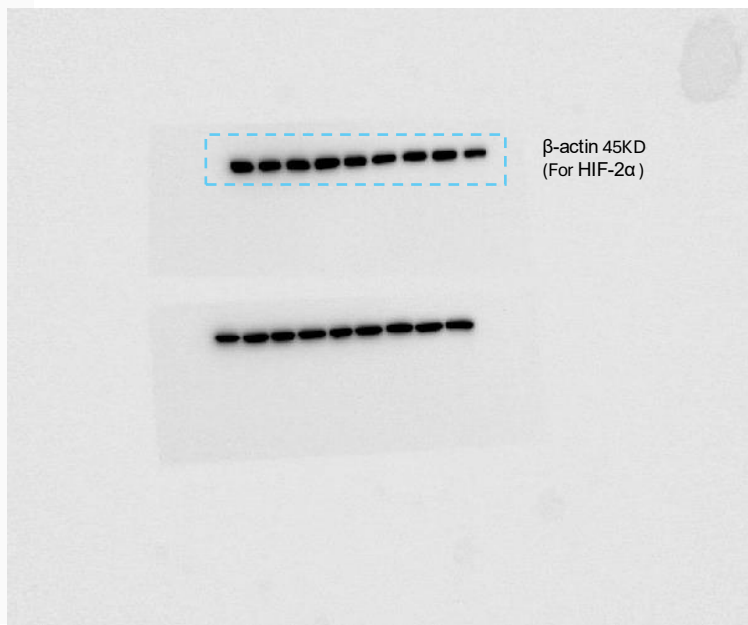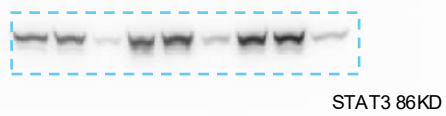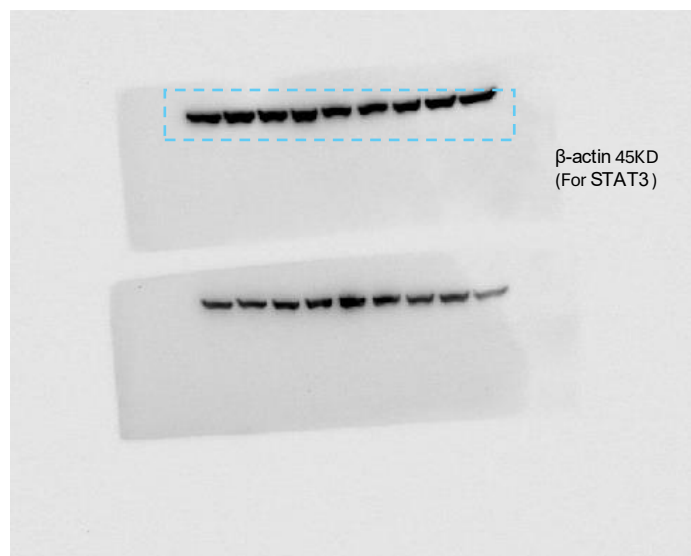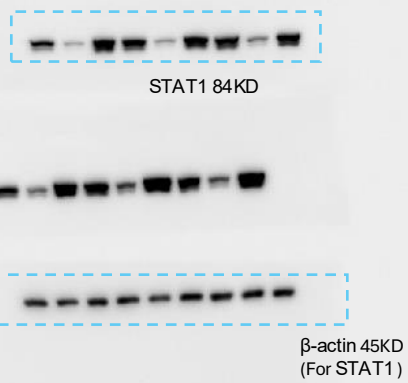

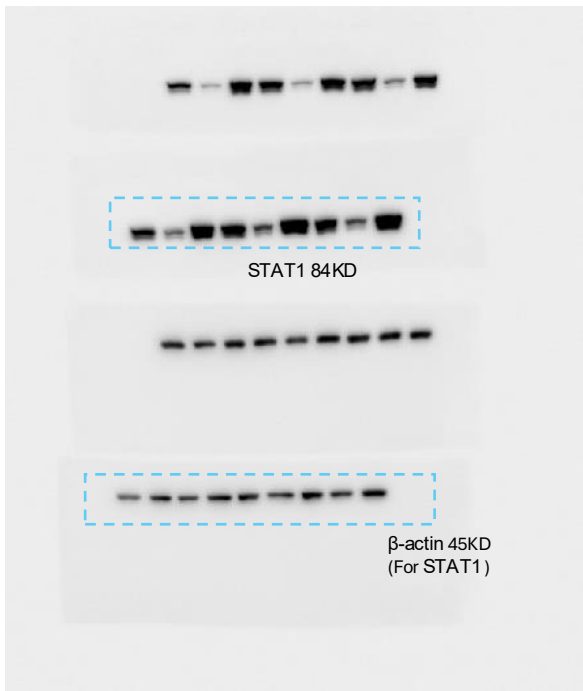

Full unedited blot/gel for Figure S5G

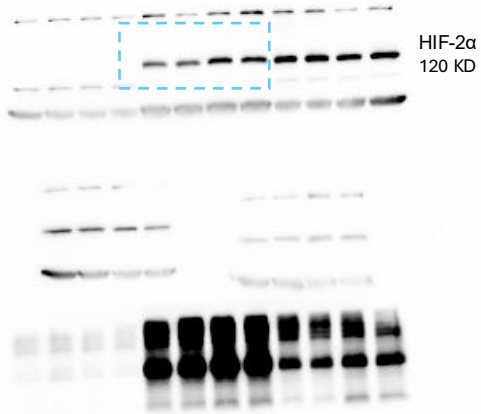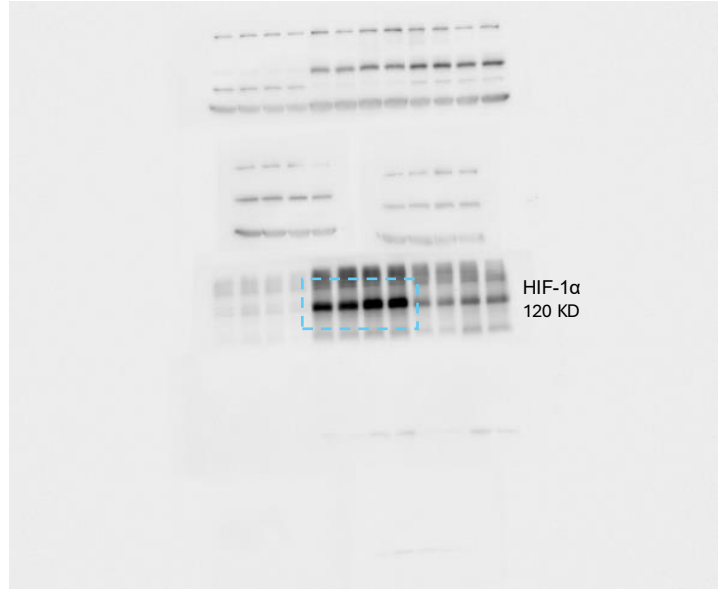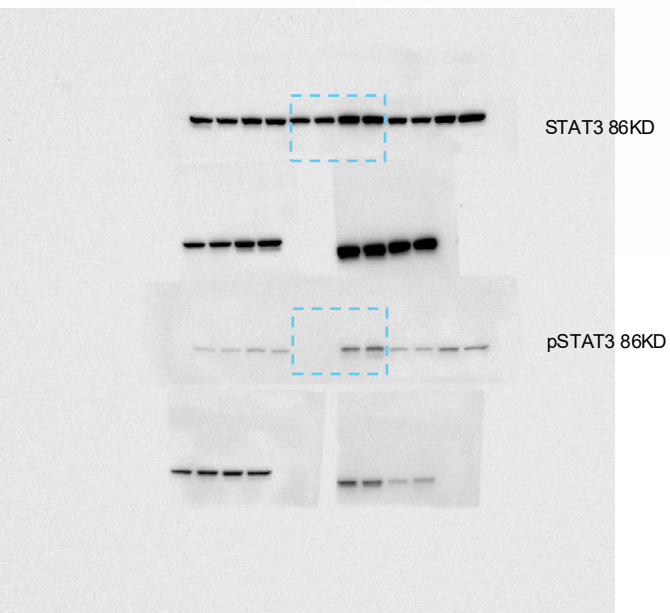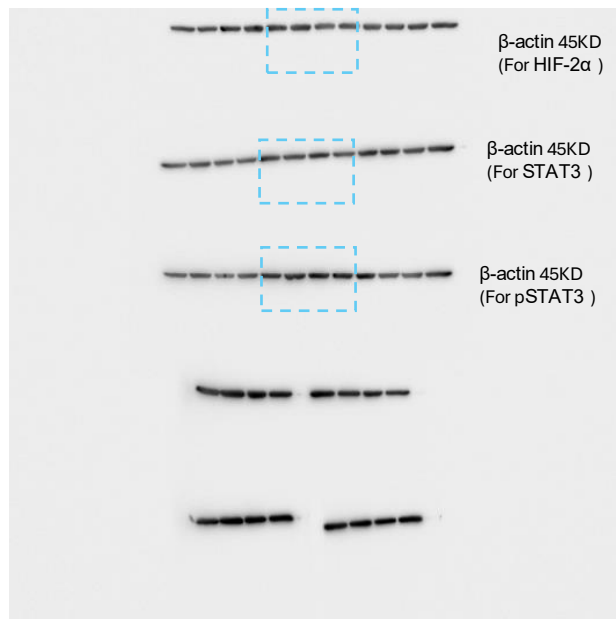

Full unedited blot/gel for Figure 6C

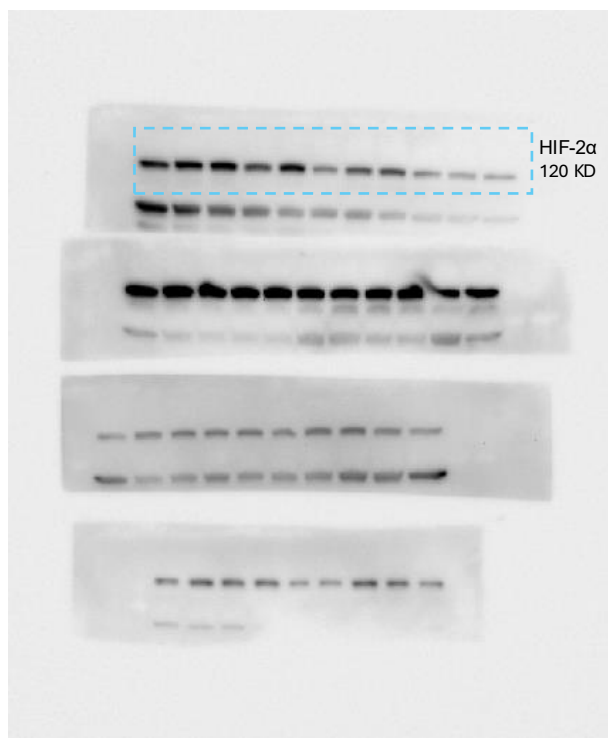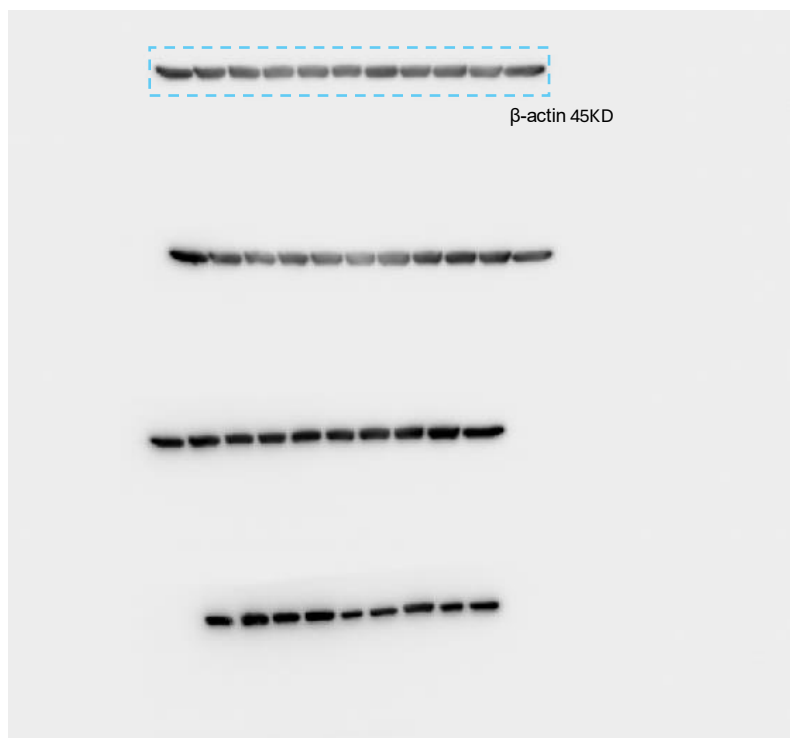

Full unedited blot/gel for Figure 6G

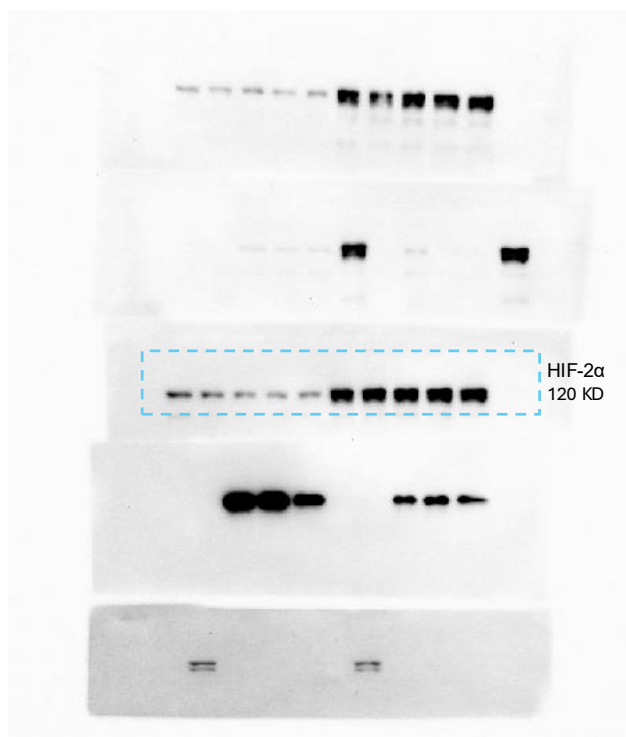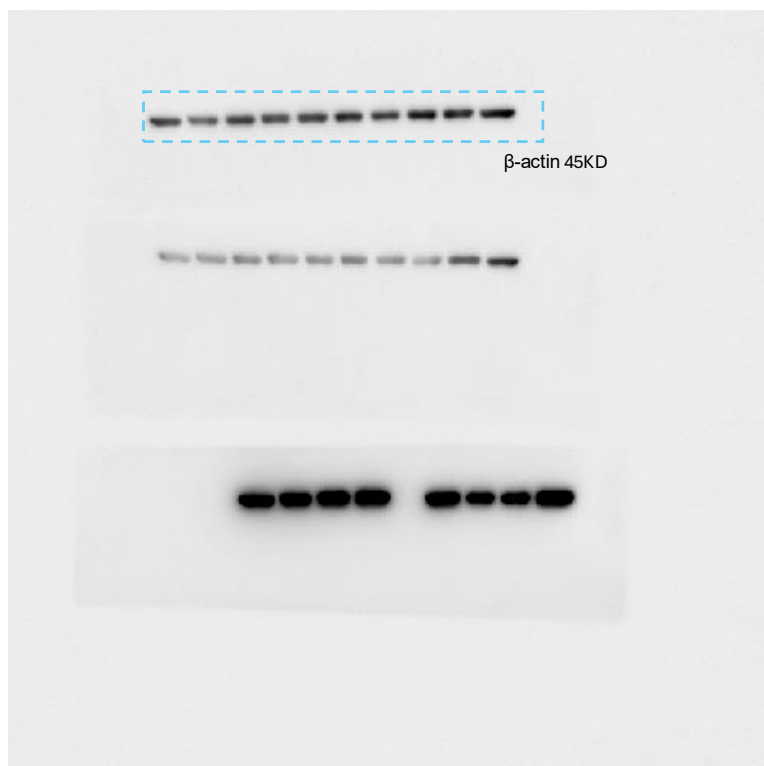

Supplement: sd2 [file 2]
