# Supplementary material for: Genome-wide CRISPR screen identifies a cytokine-enhancer circuit driving HIF-2α activation in renal cancer
Source: JCI journal article supplement (doi:10.1172/jci201639), 2026-03-24

# Supplement Figure 1

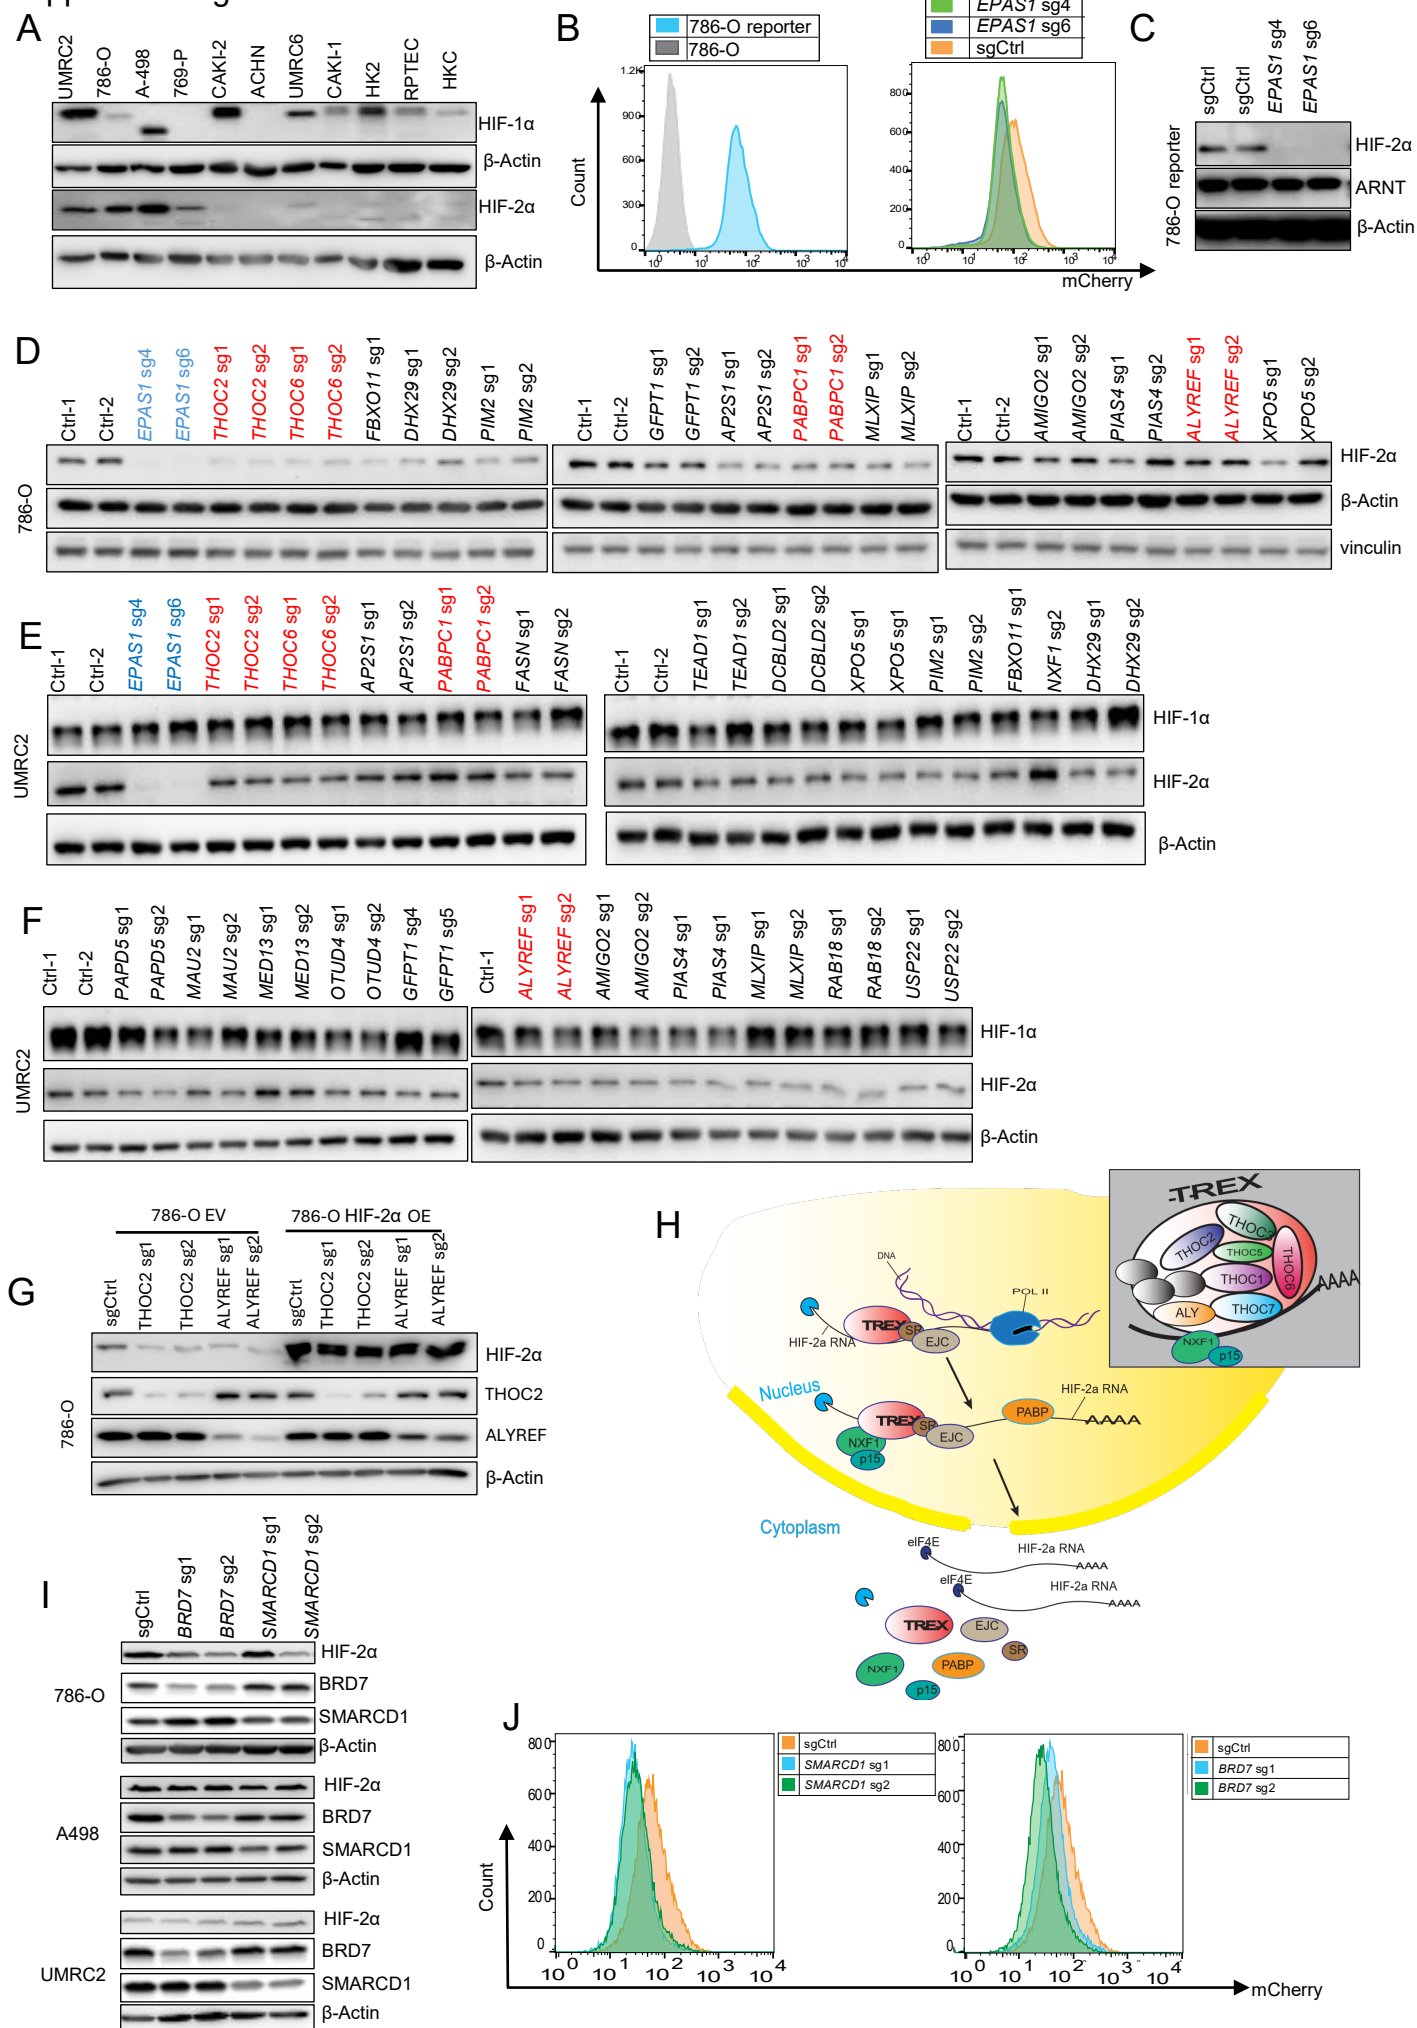

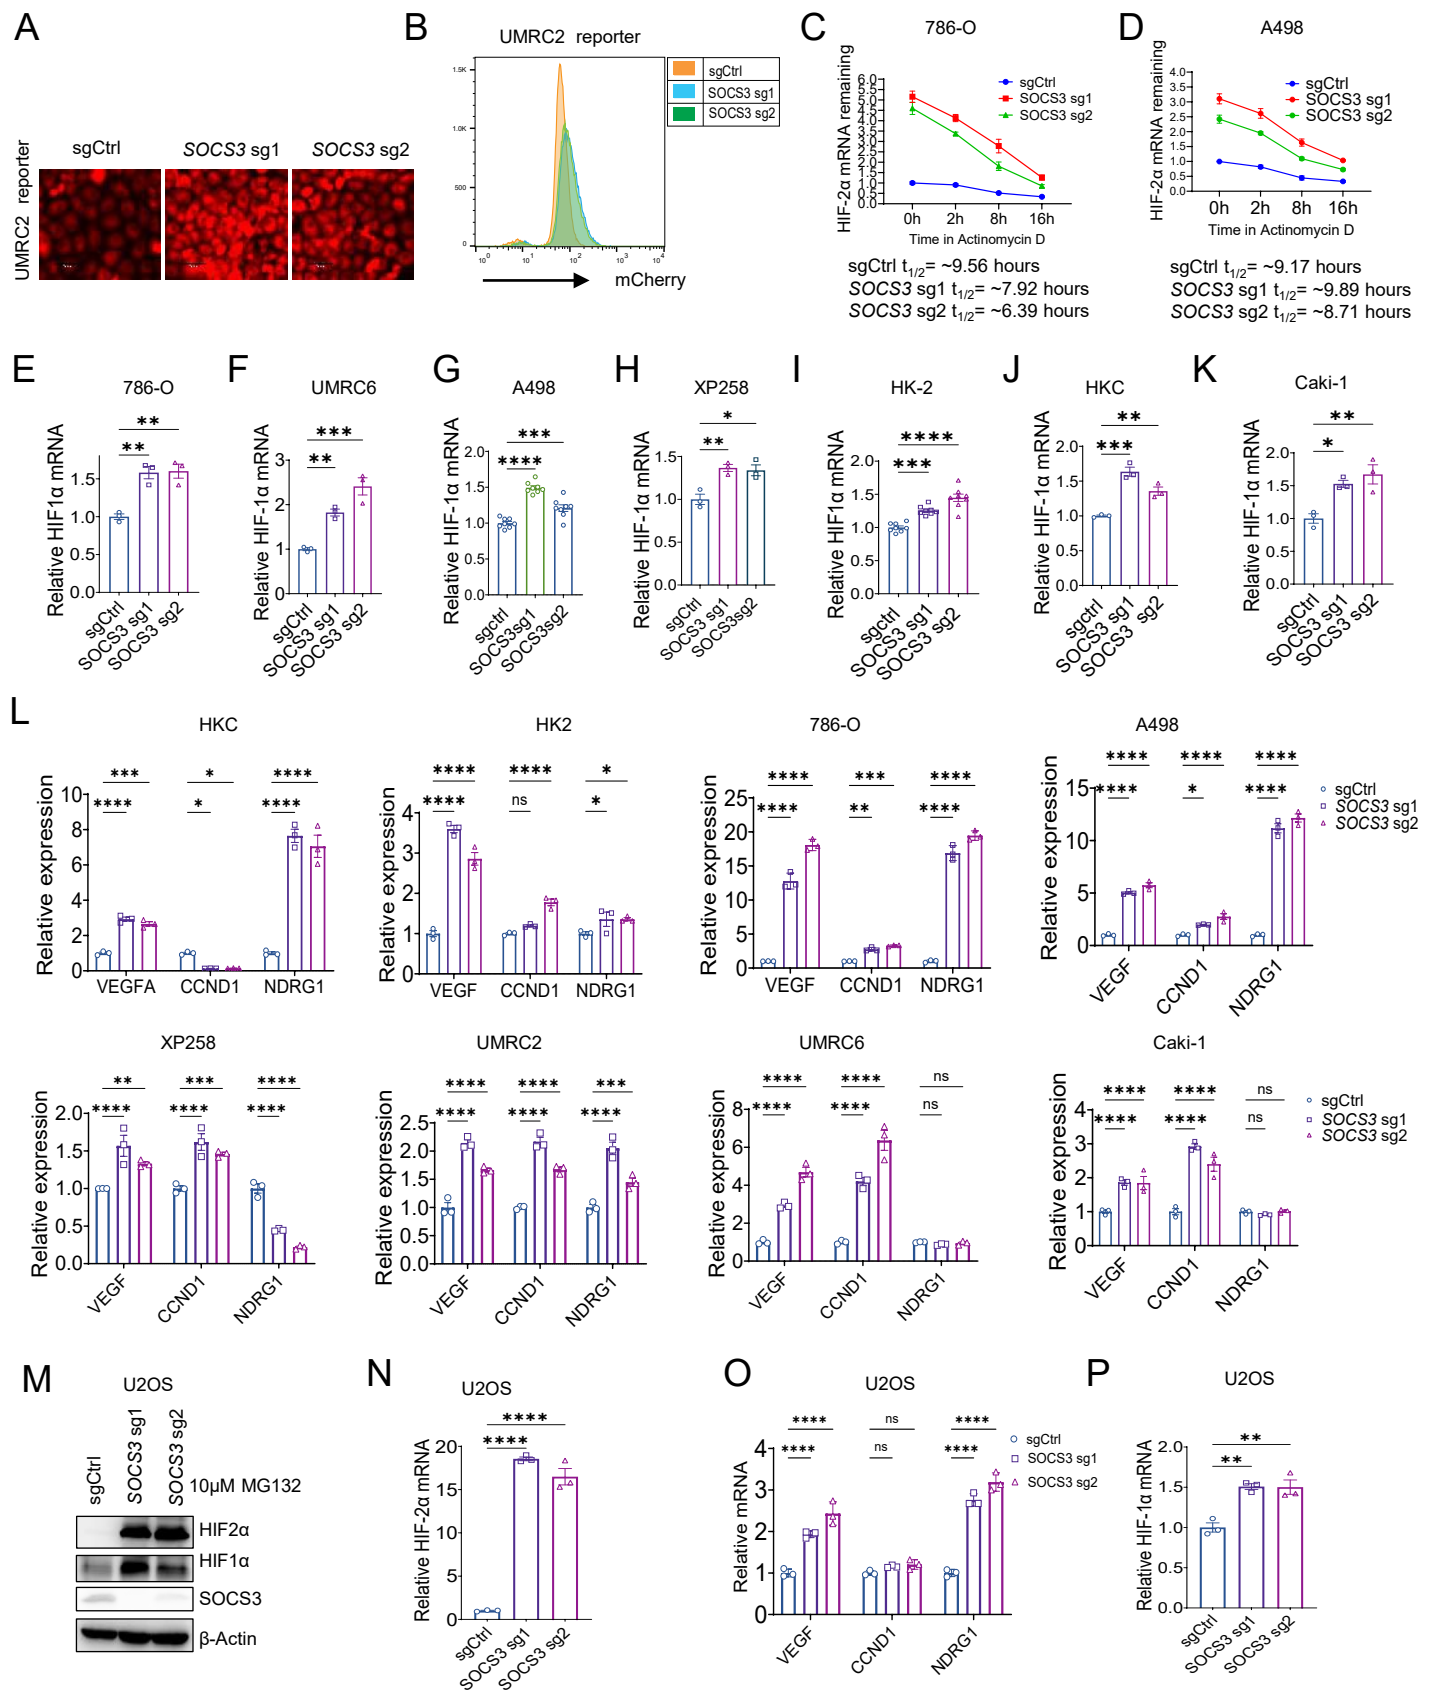

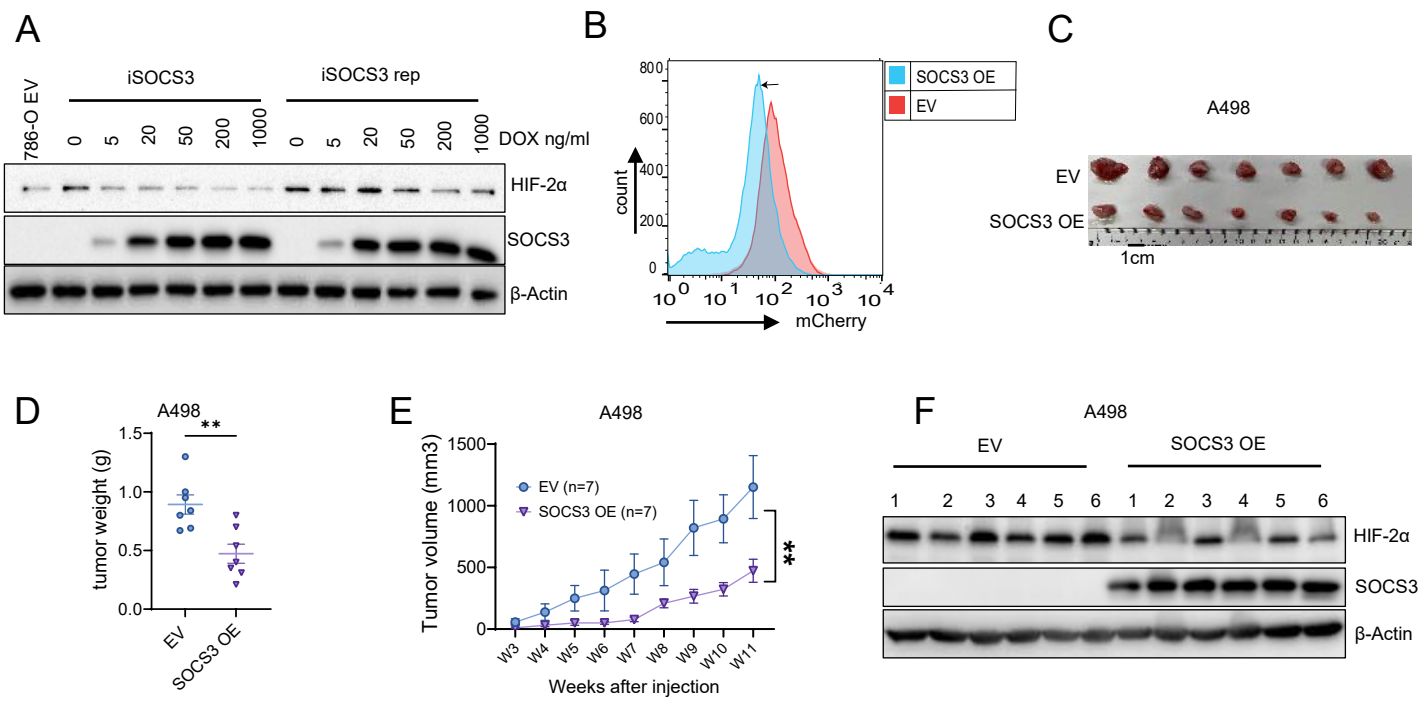

# Supplement Figure 4

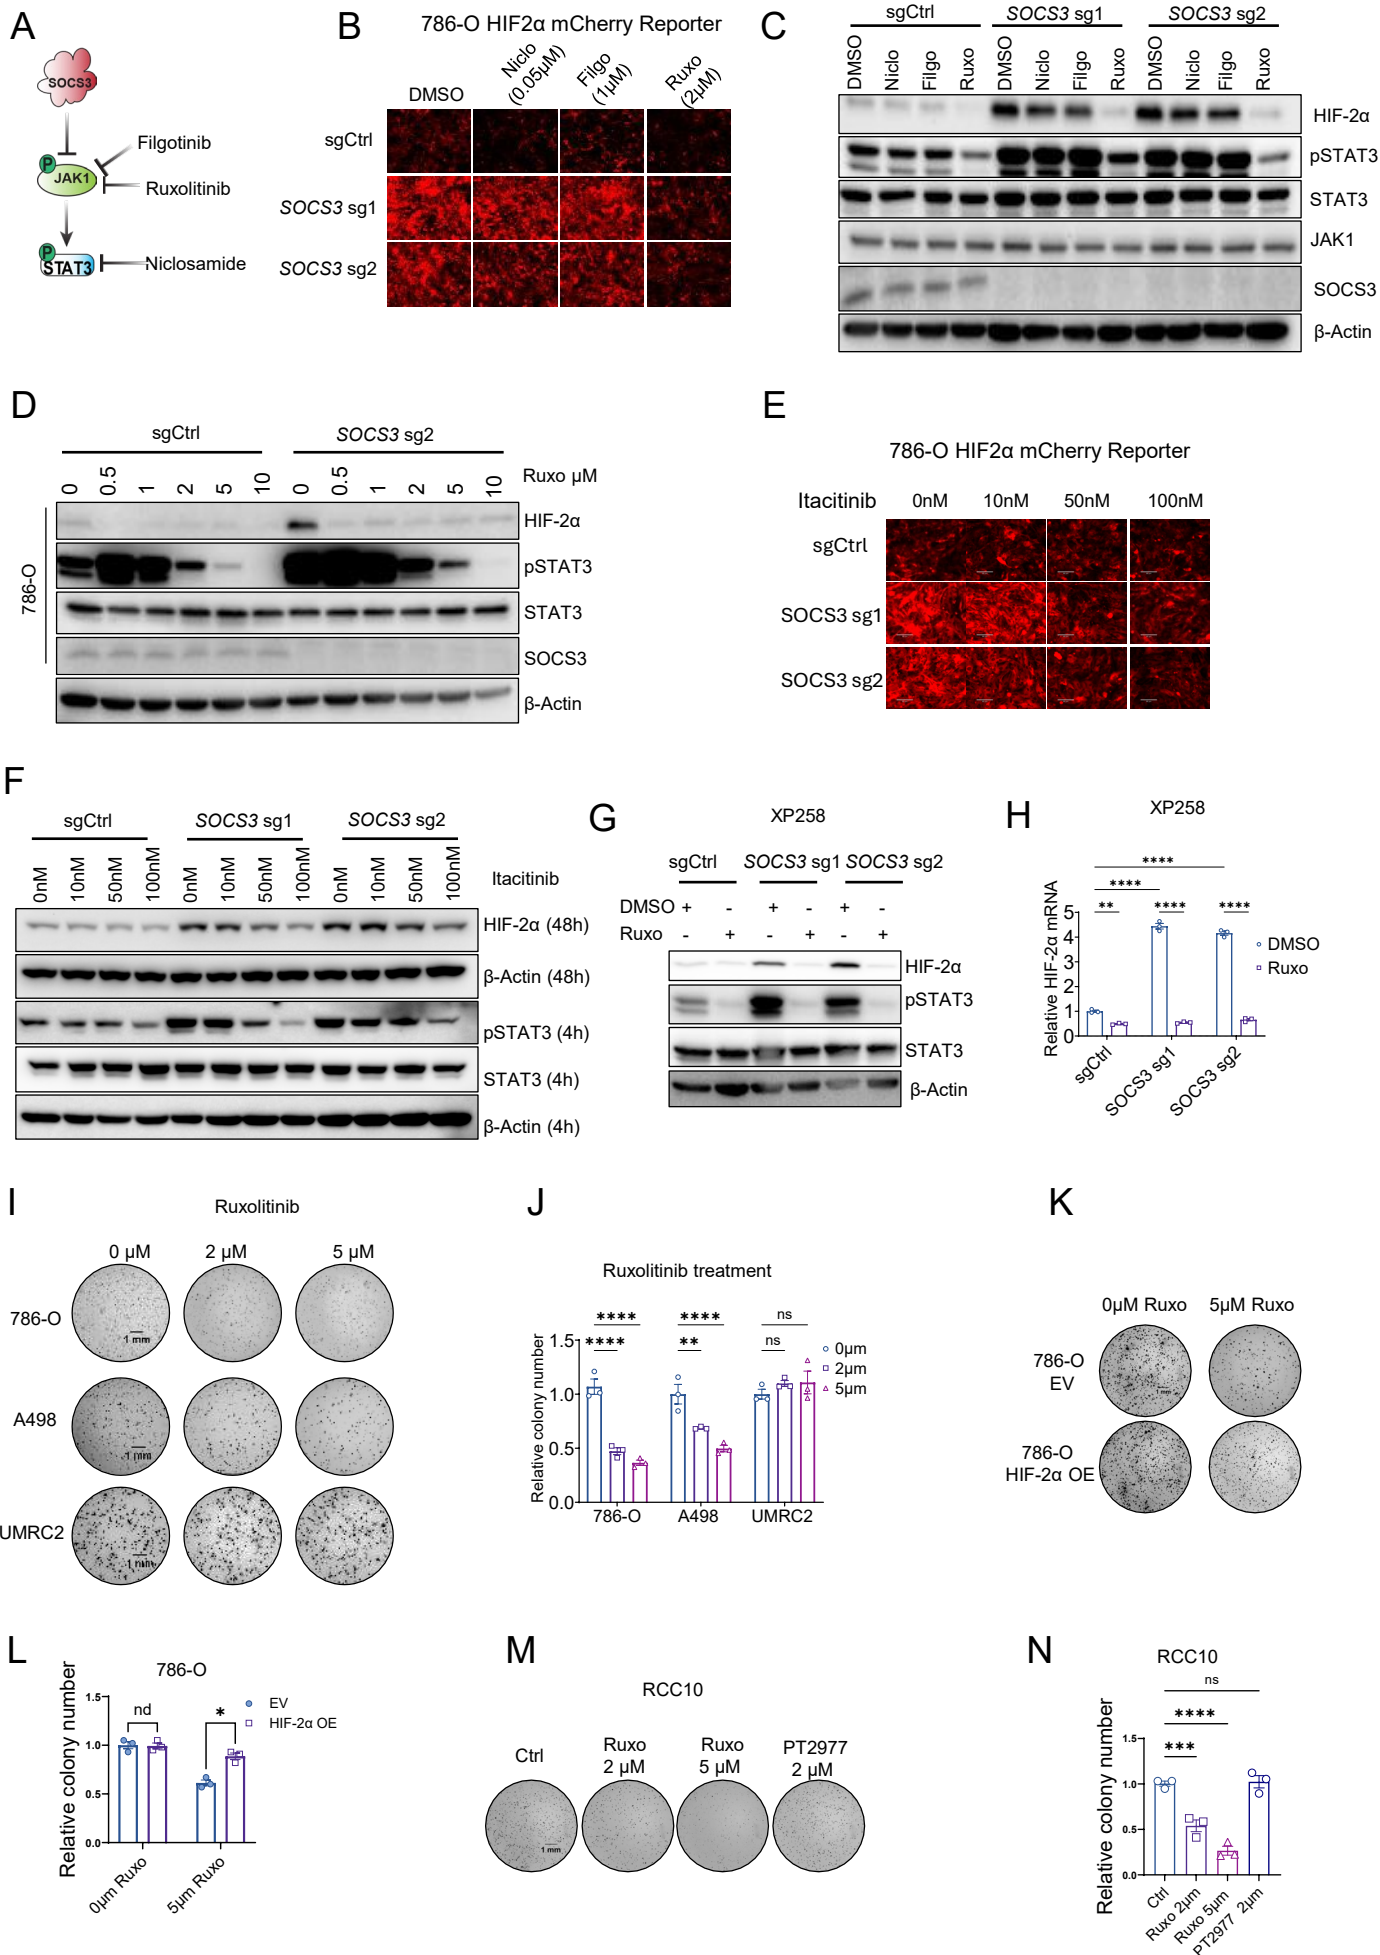



A

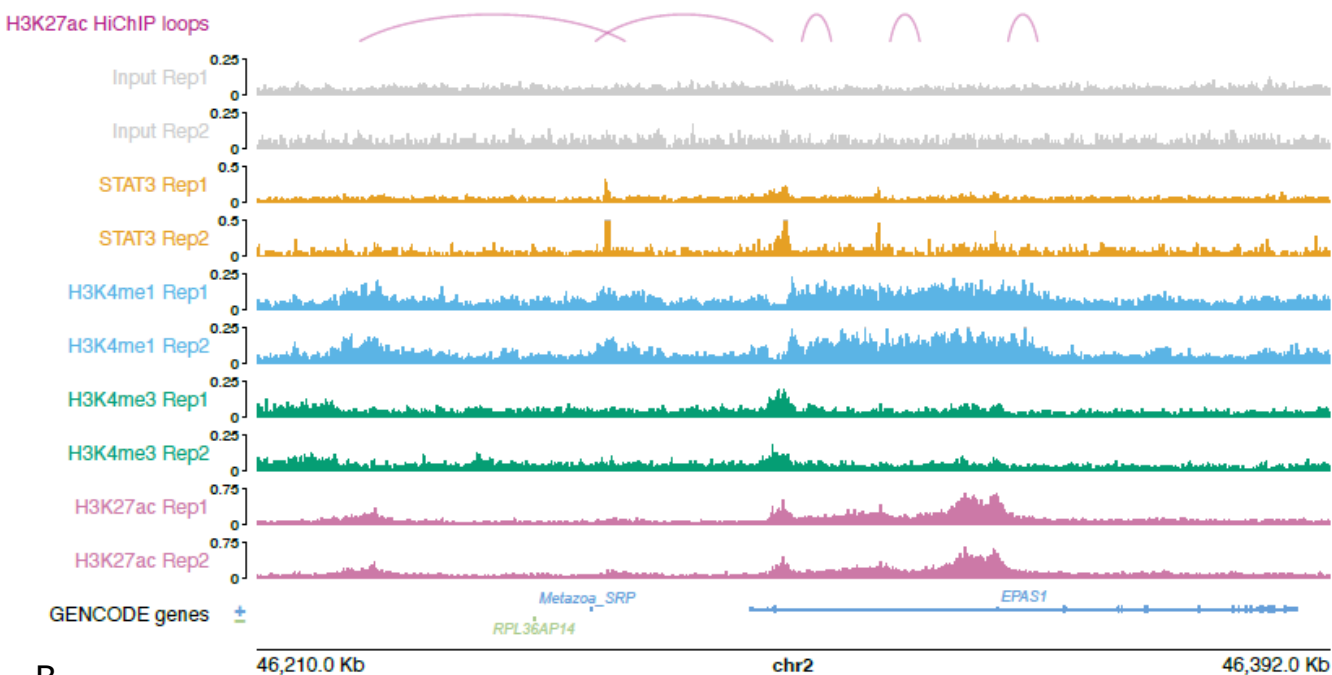

B

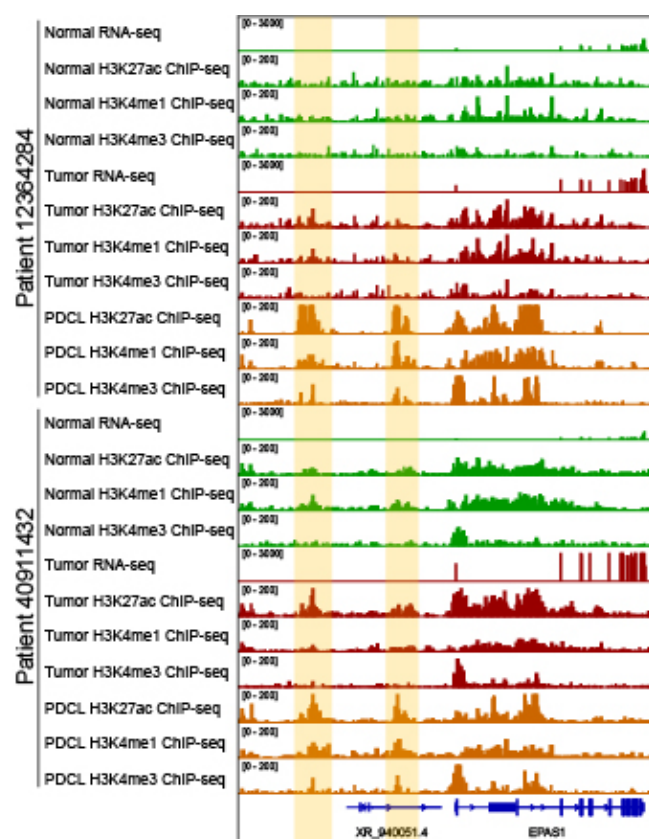

Supplement: sd1 [file 1]
